# Supplementary material for: Voltage-controlled magnetic anisotropy gradient-driven skyrmion-based half-adder and full-adder
Source: Royal Society of Chemistry journal article supplement (doi:10.1039/d3nr05545k), 2023-12-22

$$\alpha_1 = 110^\circ, \alpha_2 = 113^\circ, \alpha_3 = 116^\circ$$

$$\alpha_1 = 118^\circ, \alpha_2 = 122^\circ, \alpha_3 = 126^\circ$$

Initial

Intermediate

Final

Initial

Intermediate

Final

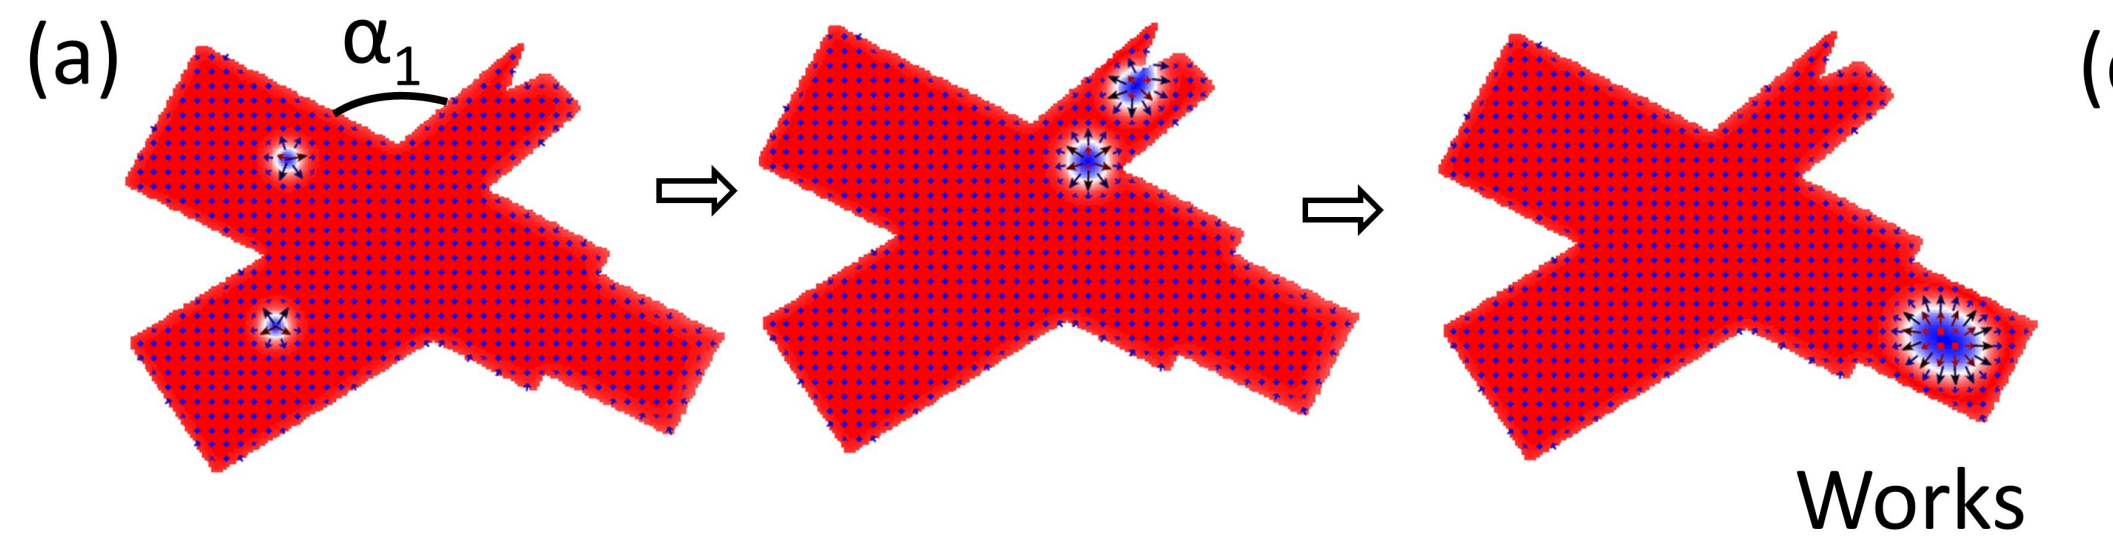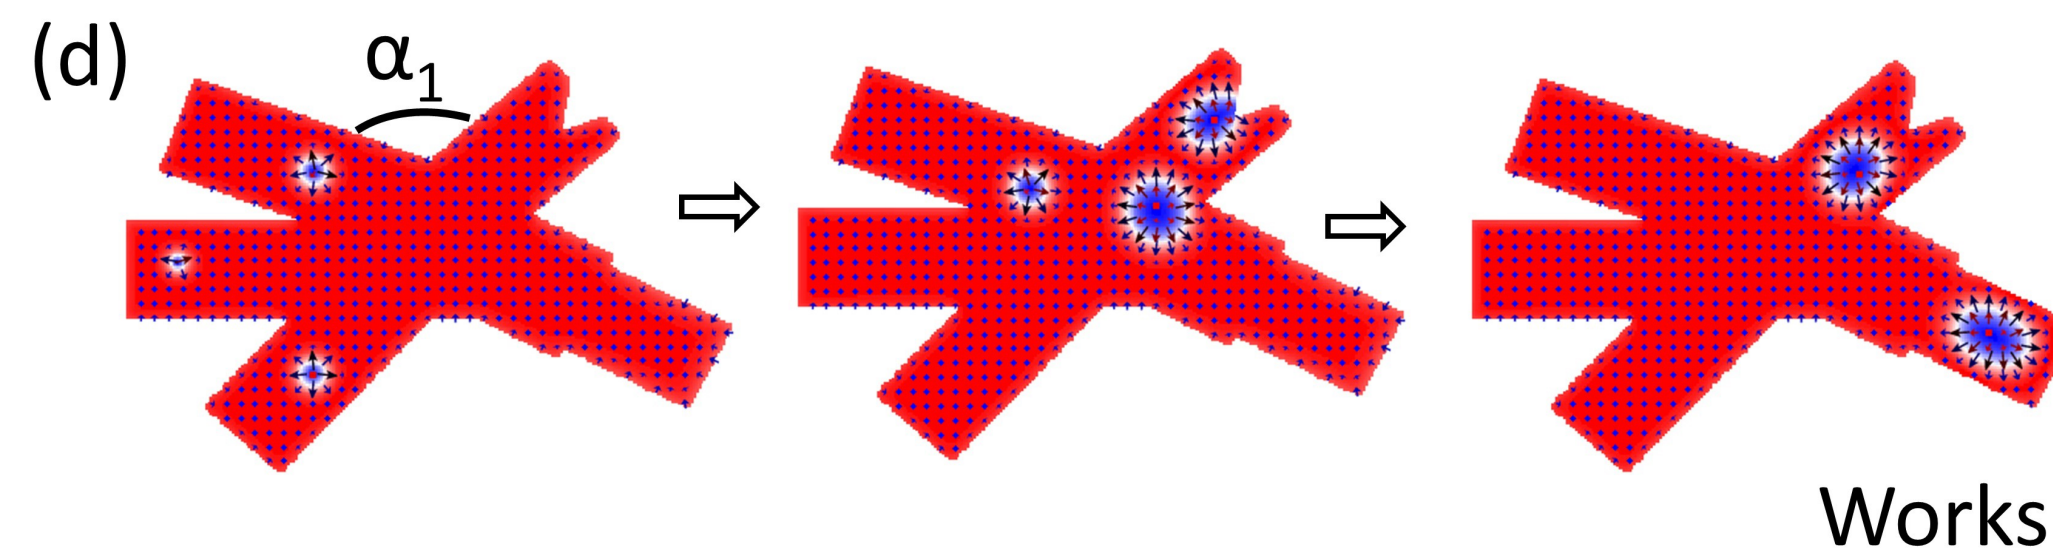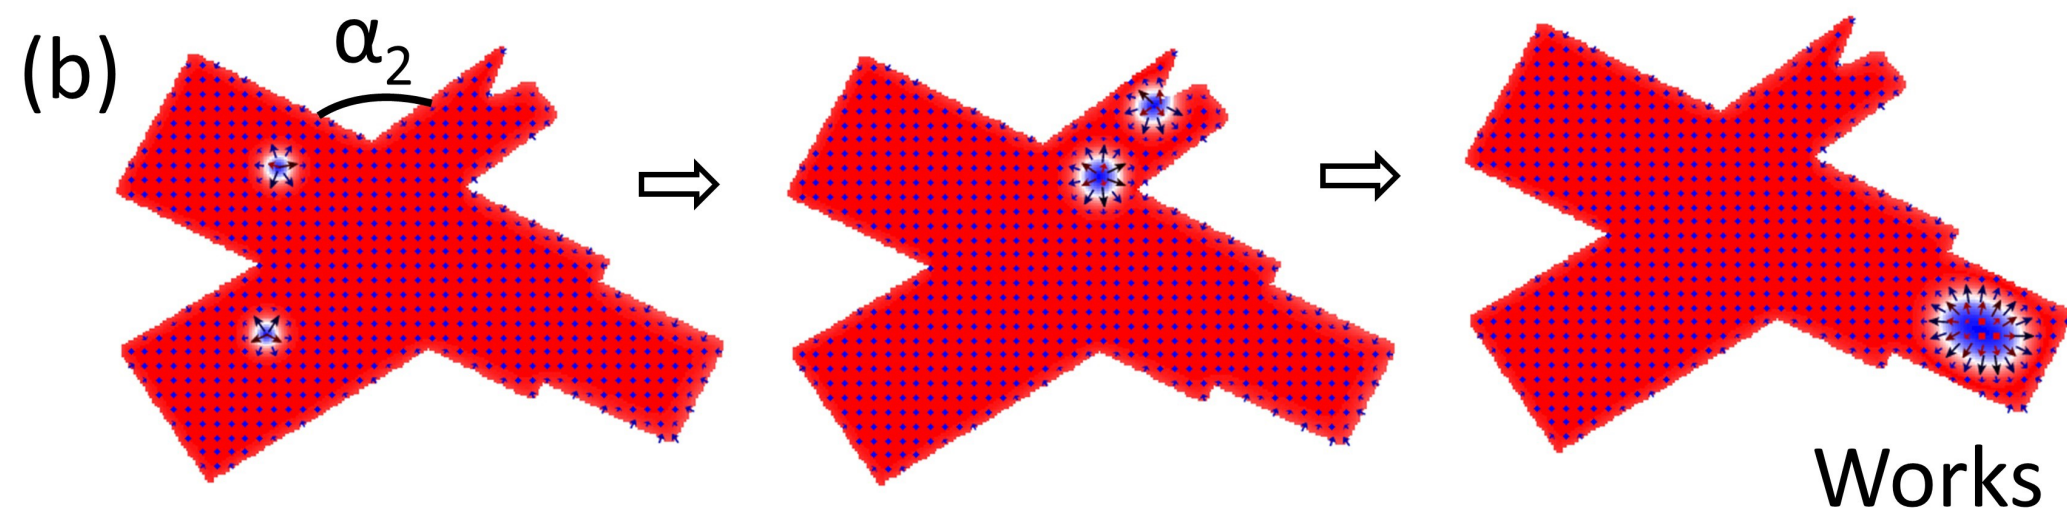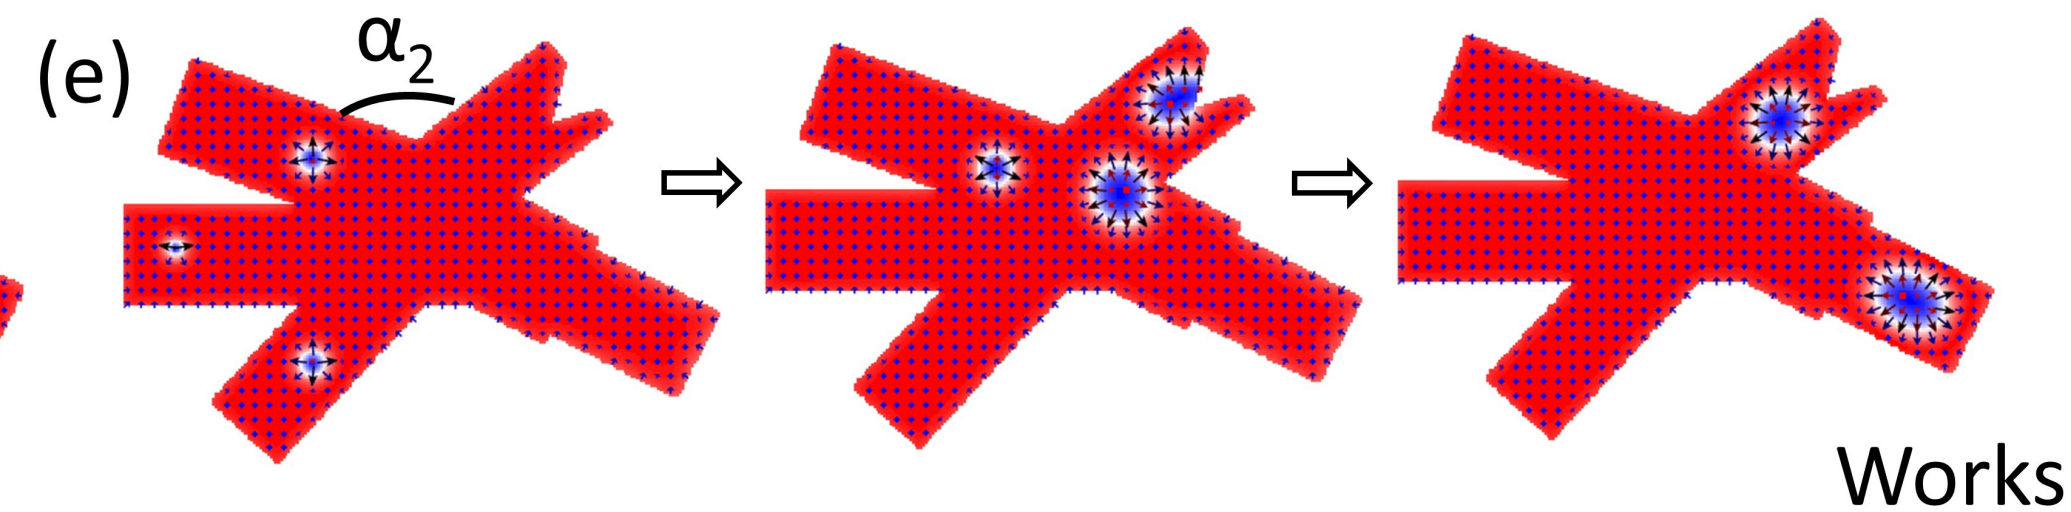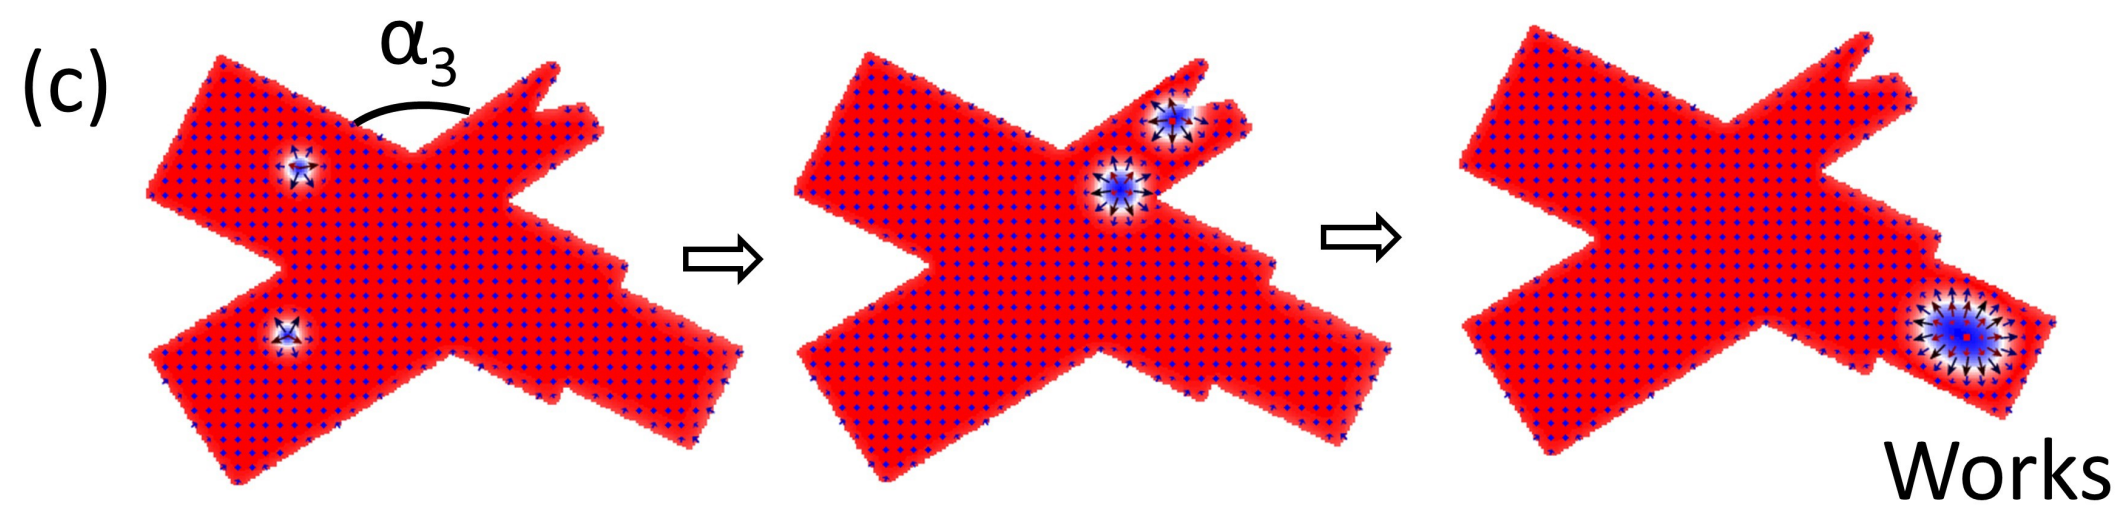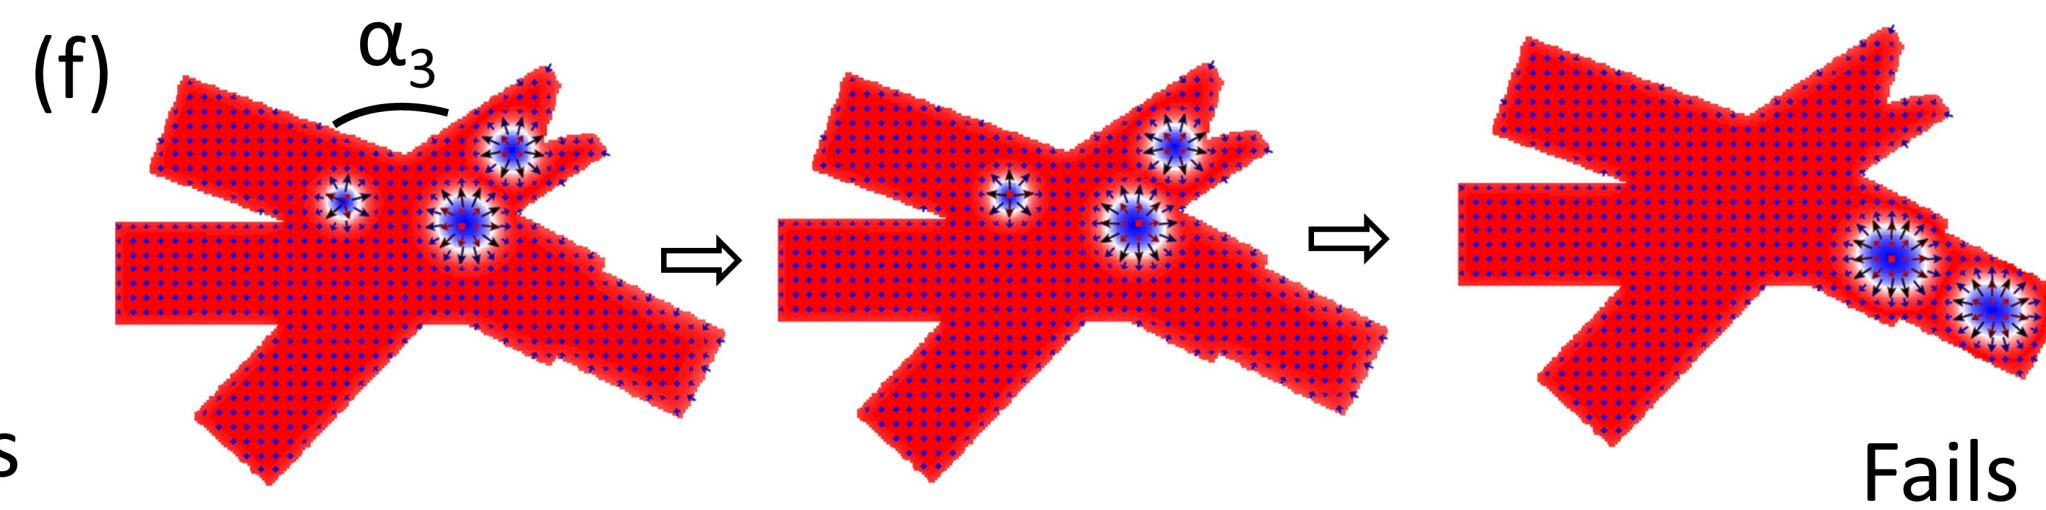

Supplement: d3nr05545k21.pdf [file d3nr05545k21.pdf]
