# Supplementary material for: Voltage-controlled magnetic anisotropy gradient-driven skyrmion-based half-adder and full-adder
Source: Royal Society of Chemistry journal article supplement (doi:10.1039/d3nr05545k), 2023-12-22

$n_1 = 44 \text{ nm}$ ,  $n_2 = 45 \text{ nm}$ ,  $n_3 = 49 \text{ nm}$

$n_1 = 50 \text{ nm}$ ,  $n_2 = 52 \text{ nm}$ ,  $n_3 = 54 \text{ nm}$

Initial

Intermediate

Final

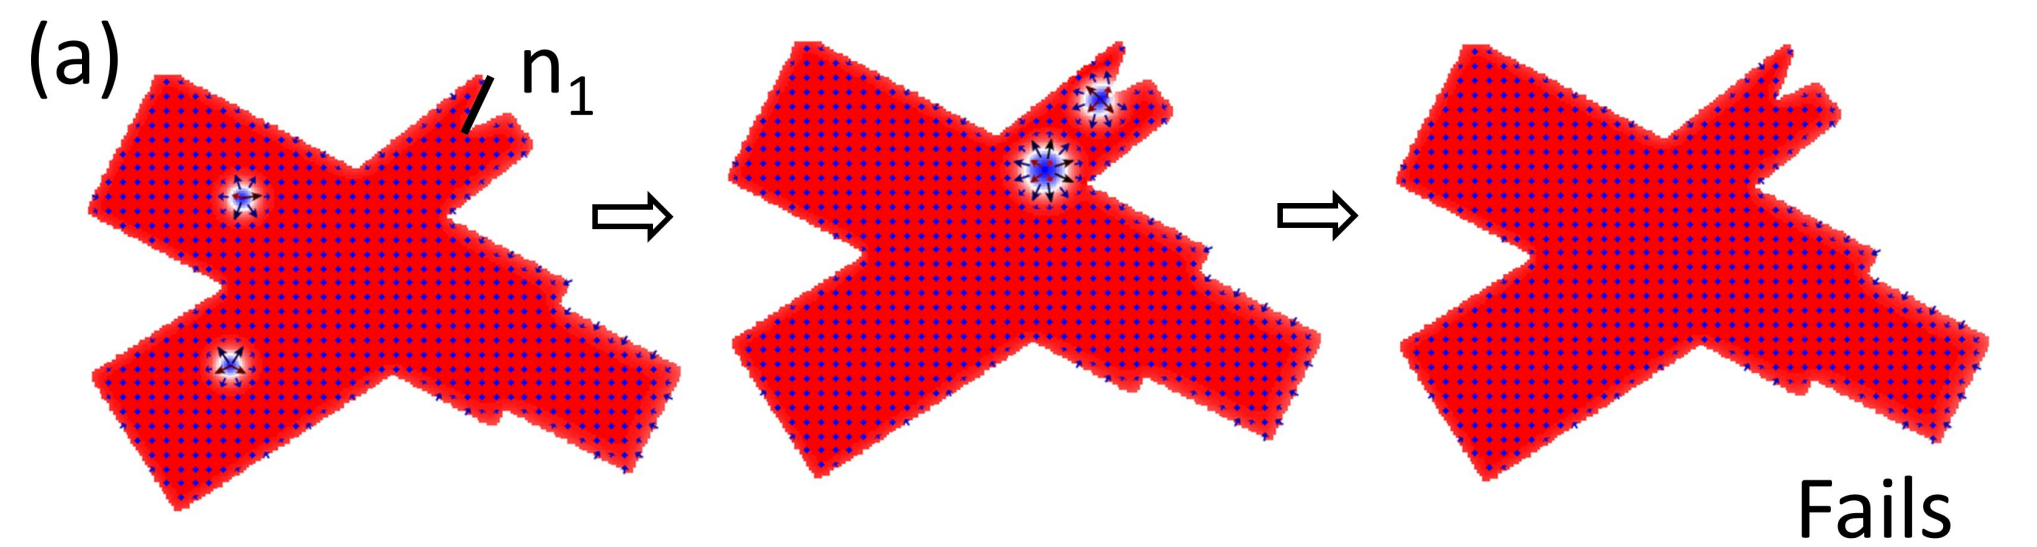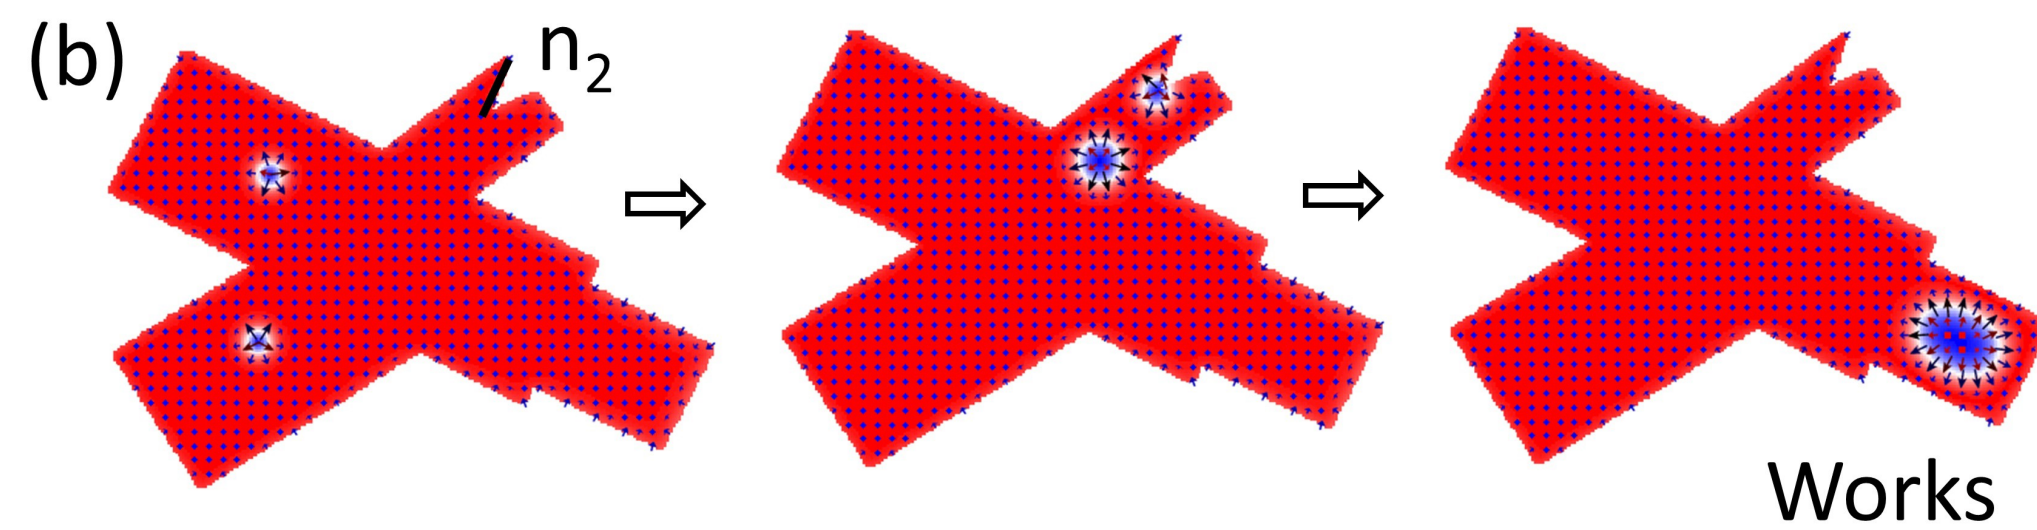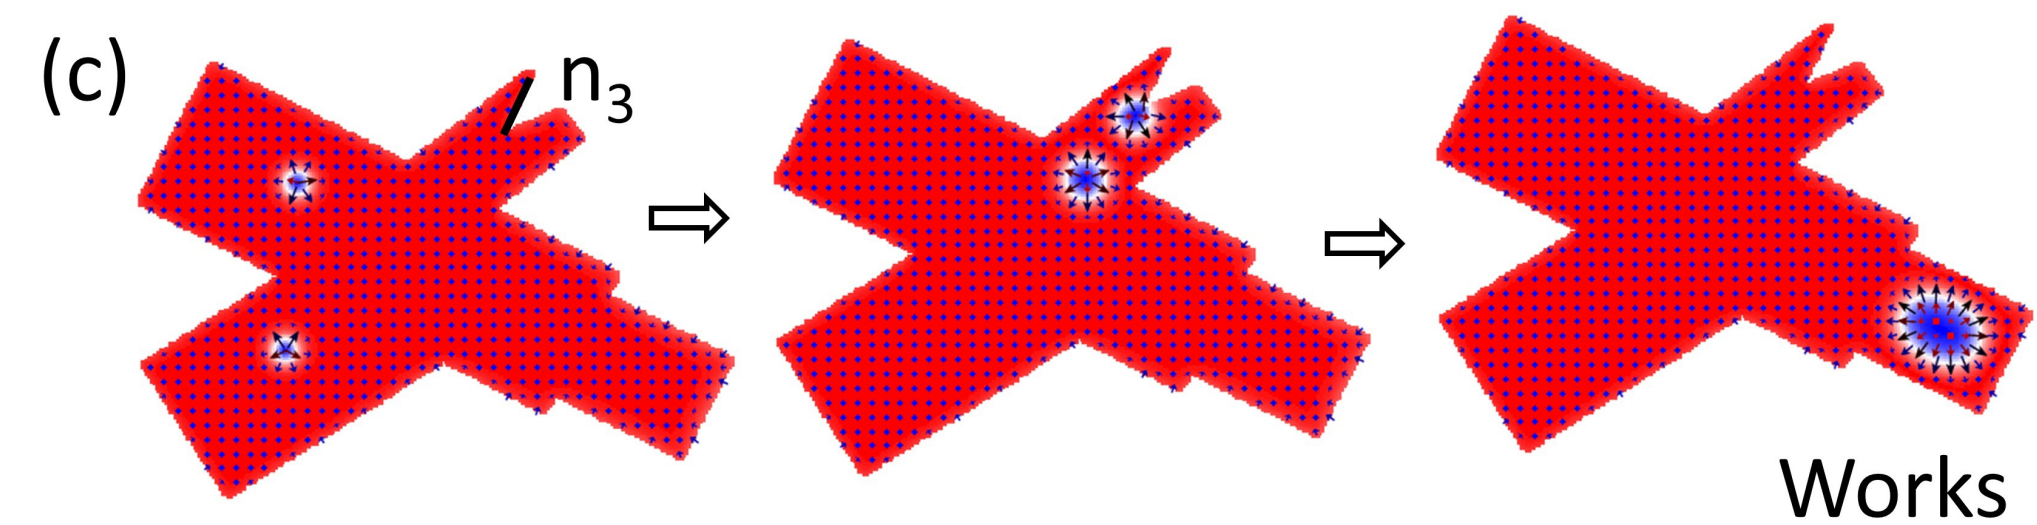

Initial

Intermediate

Final

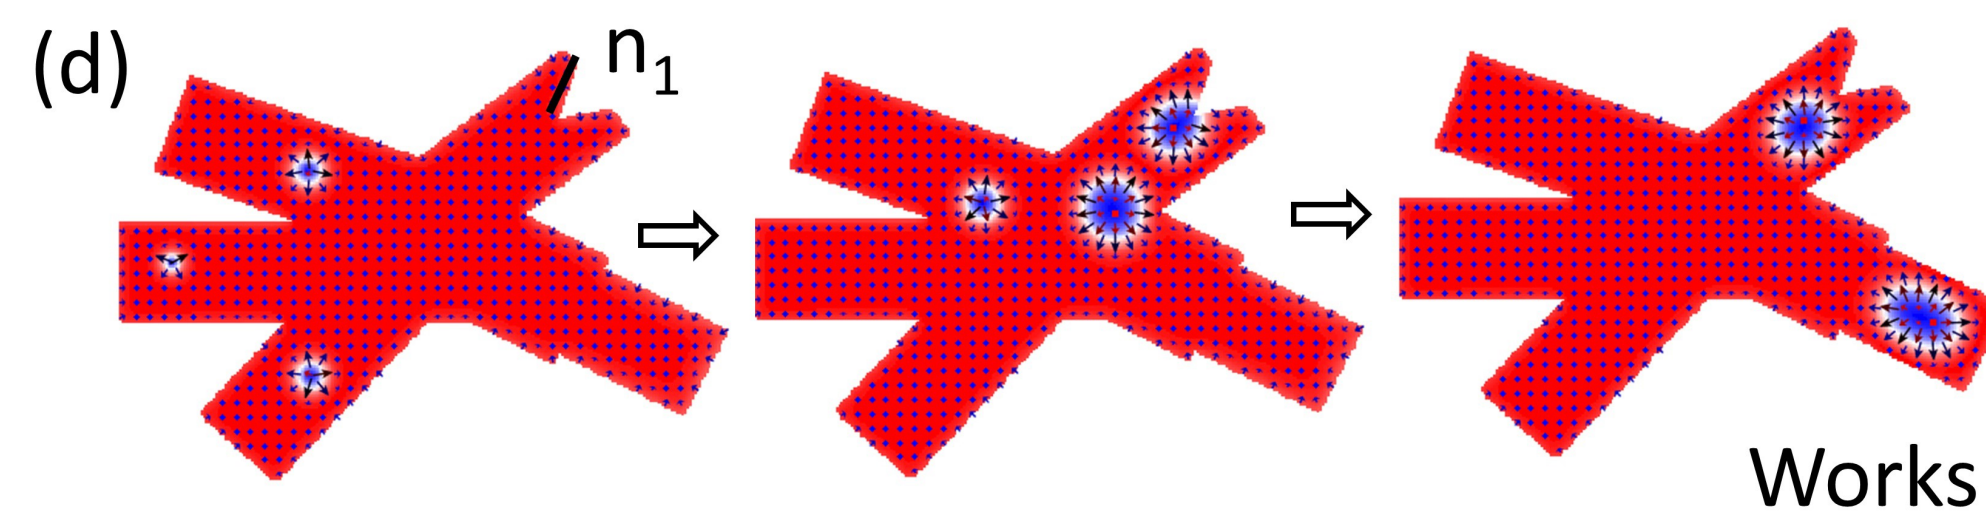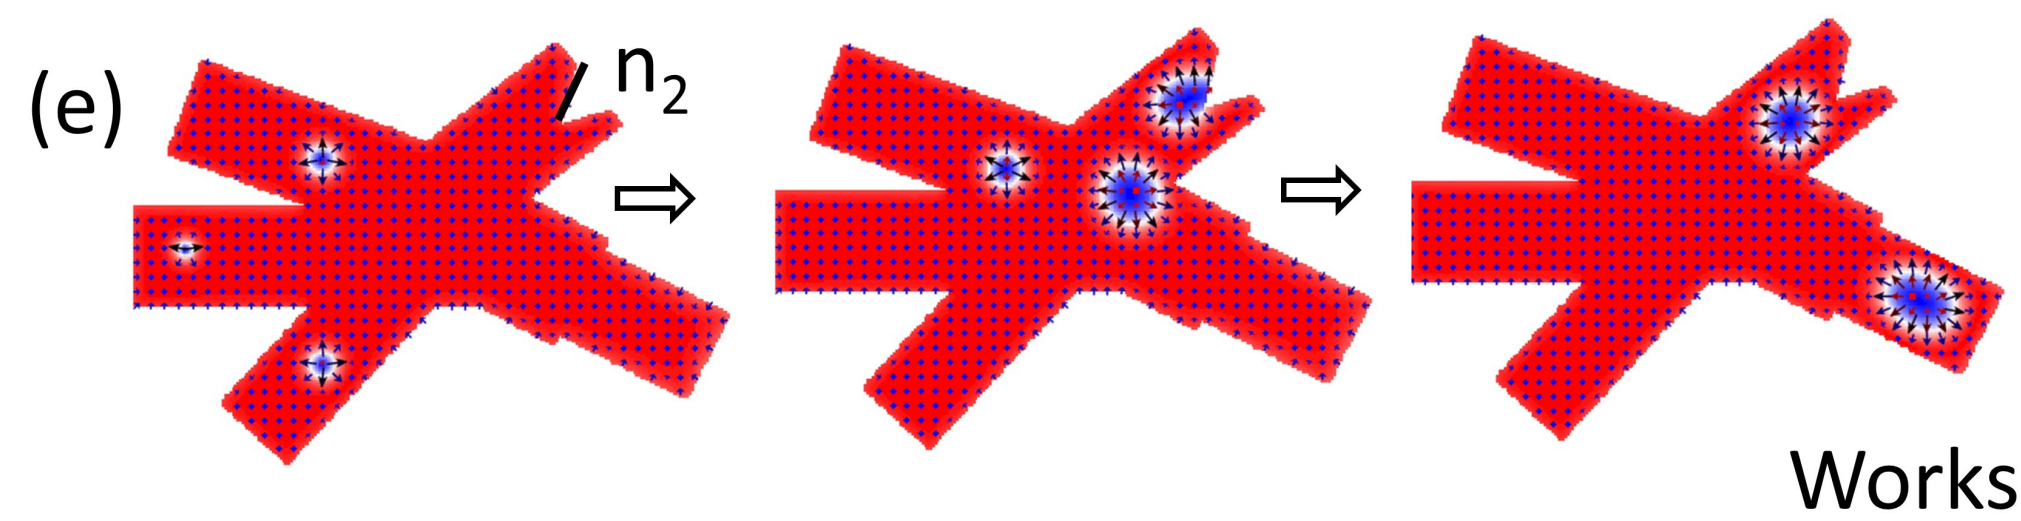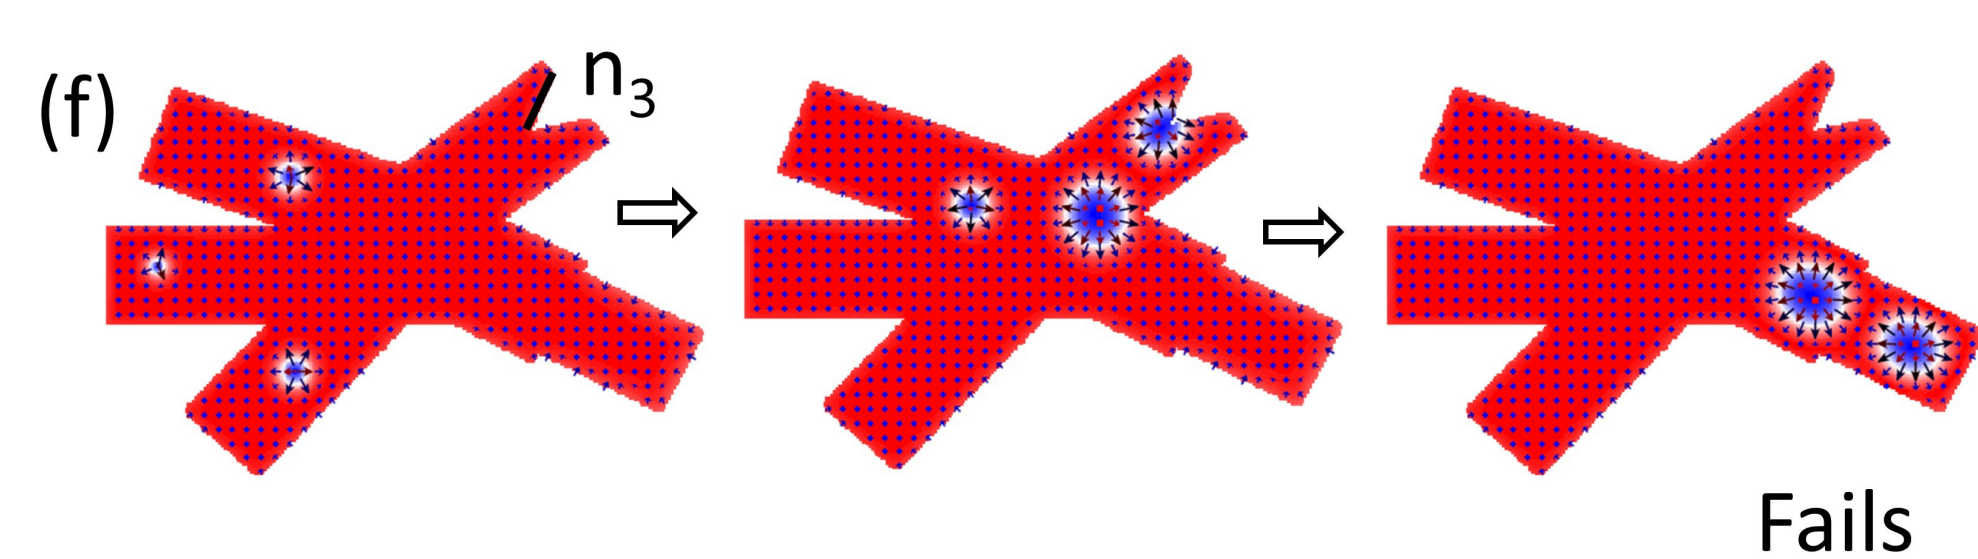

Supplement: d3nr05545k22.pdf [file d3nr05545k22.pdf]
