# Supplementary figures and images for: Voltage-controlled magnetic anisotropy gradient-driven skyrmion-based half-adder and full-adder
Source: Royal Society of Chemistry journal article supplement (doi:10.1039/d3nr05545k), 2023-12-22

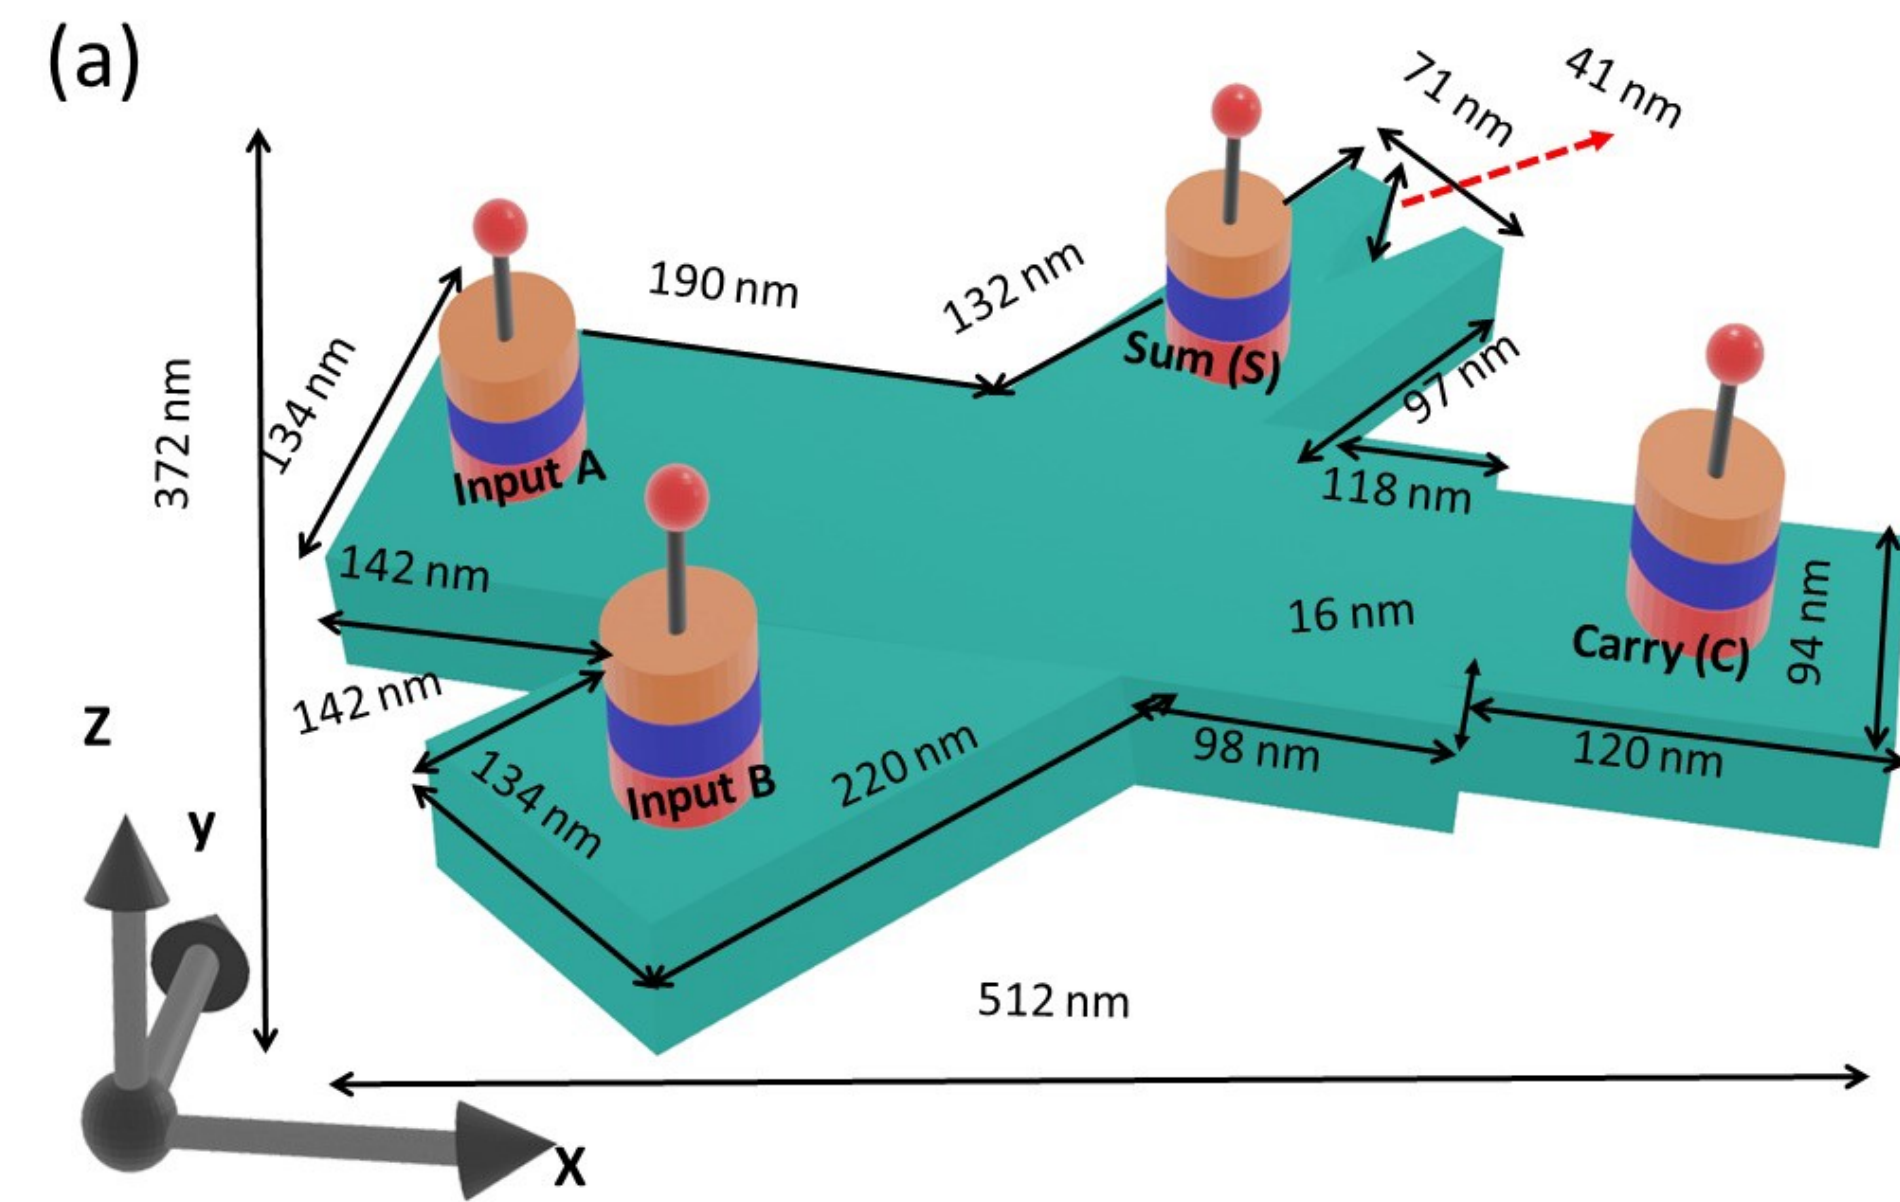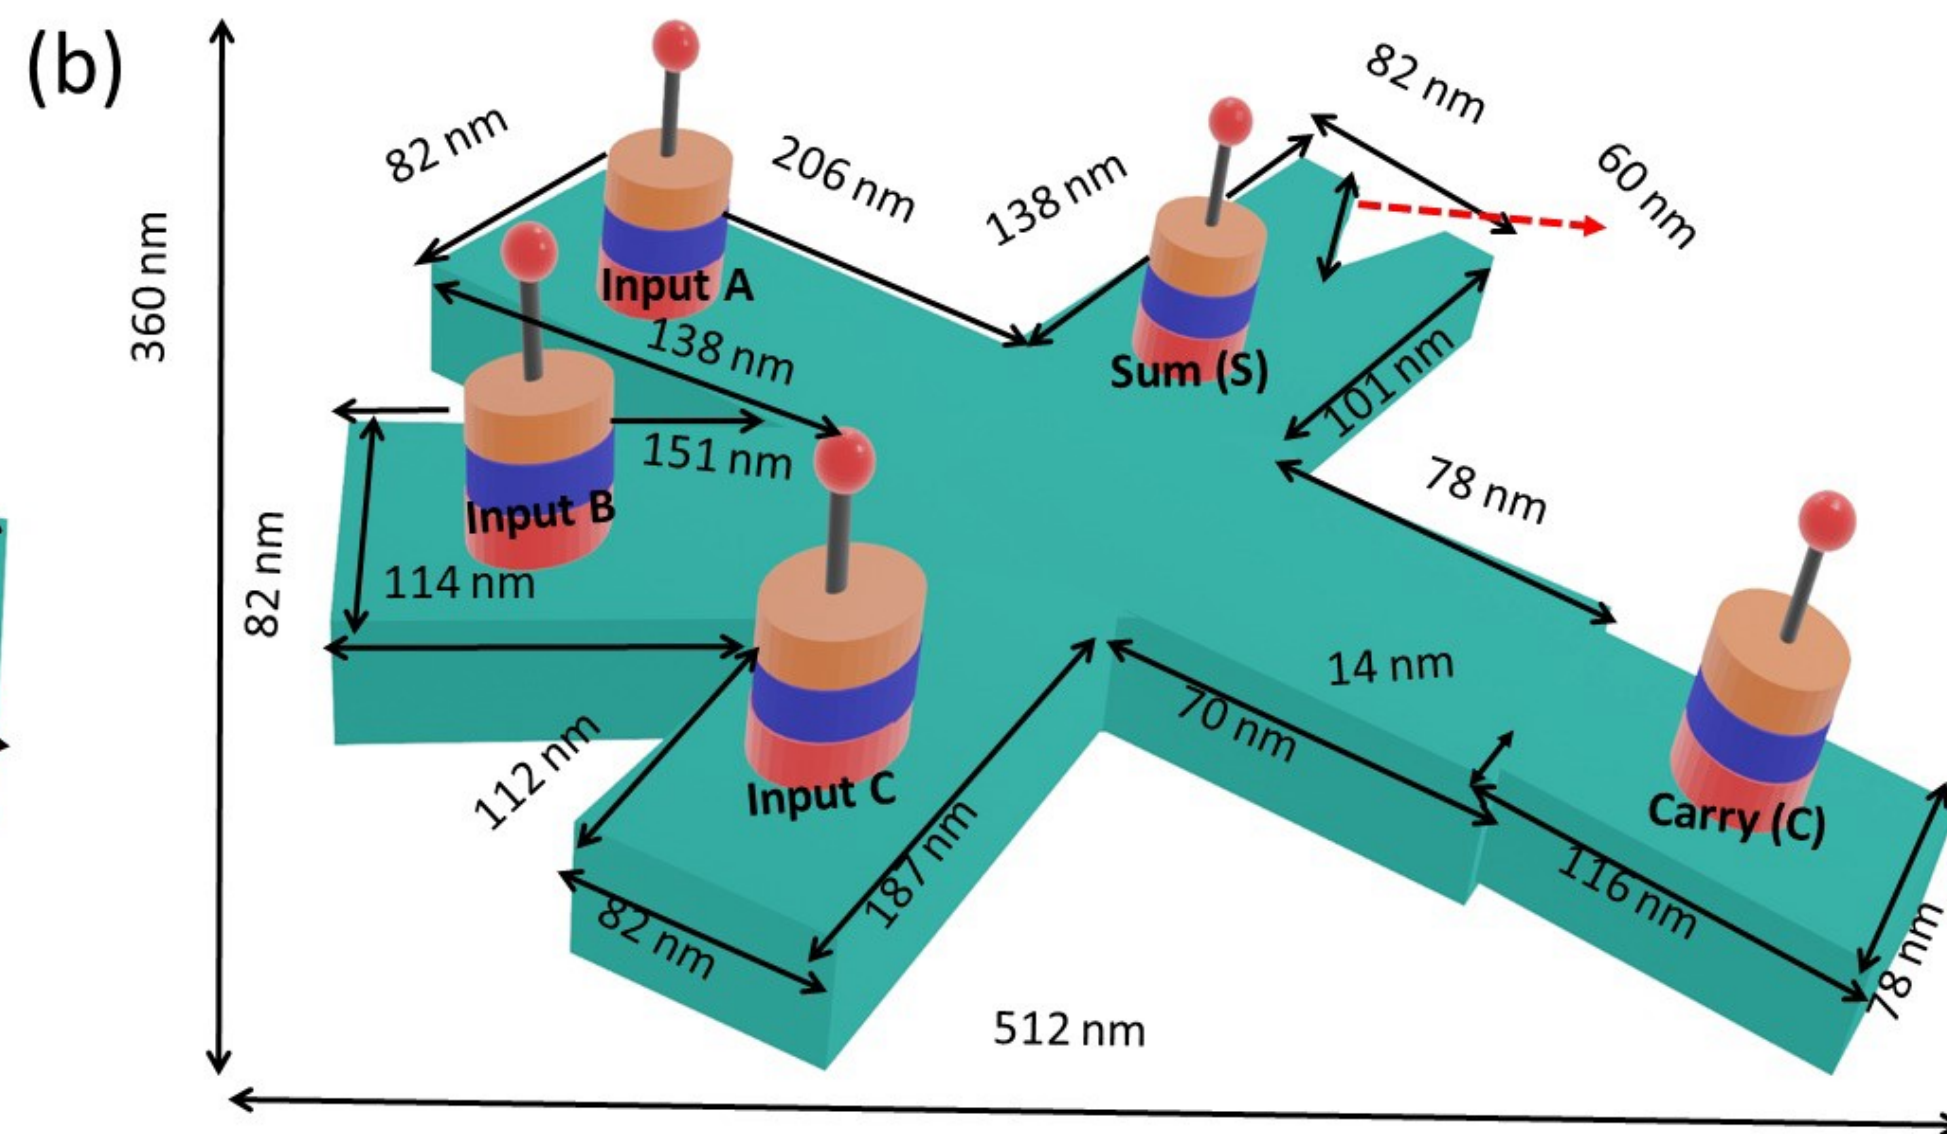

Supplement: d3nr05545k12.pdf [file d3nr05545k12.pdf]

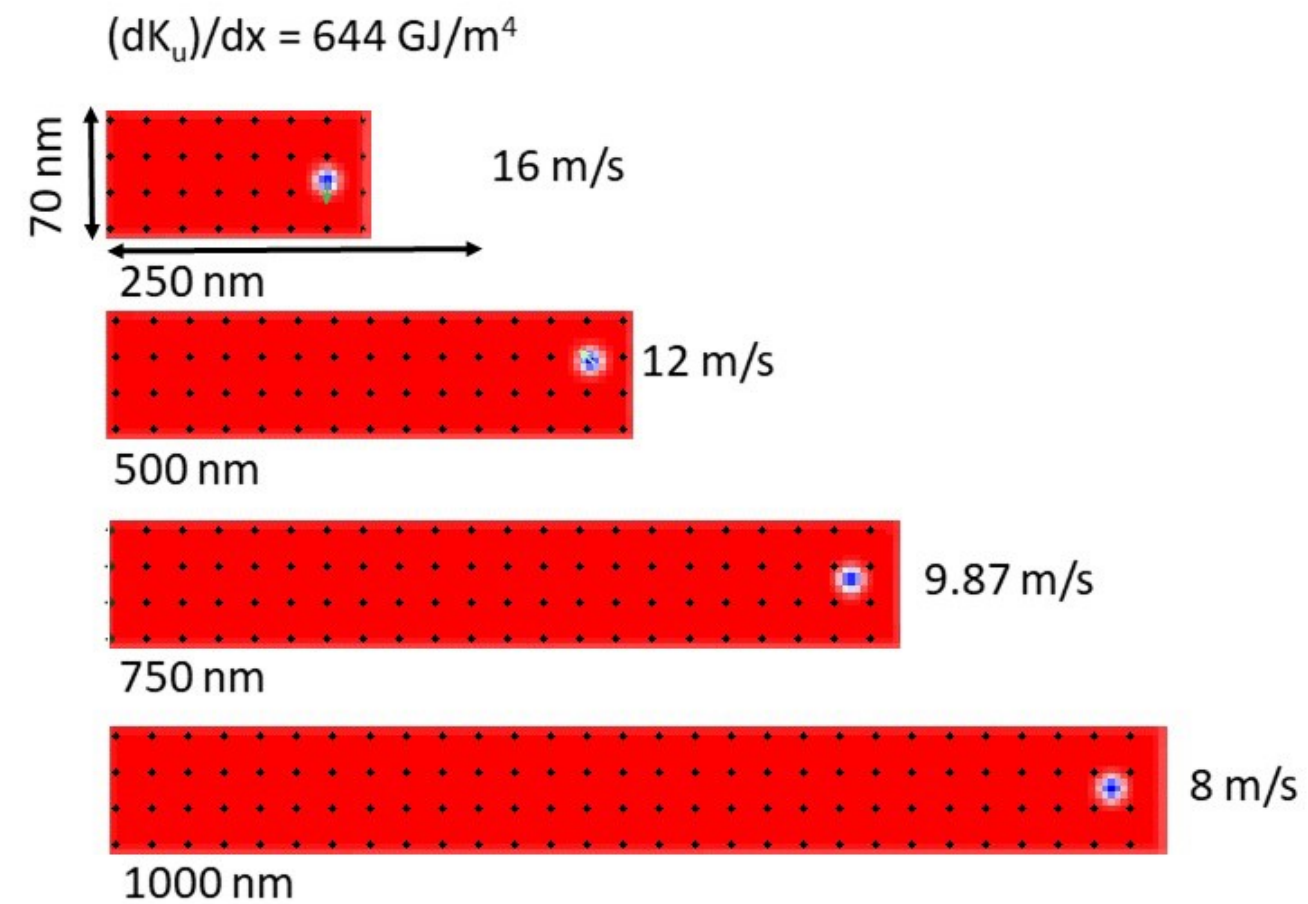

Supplement: d3nr05545k13.pdf [file d3nr05545k13.pdf]

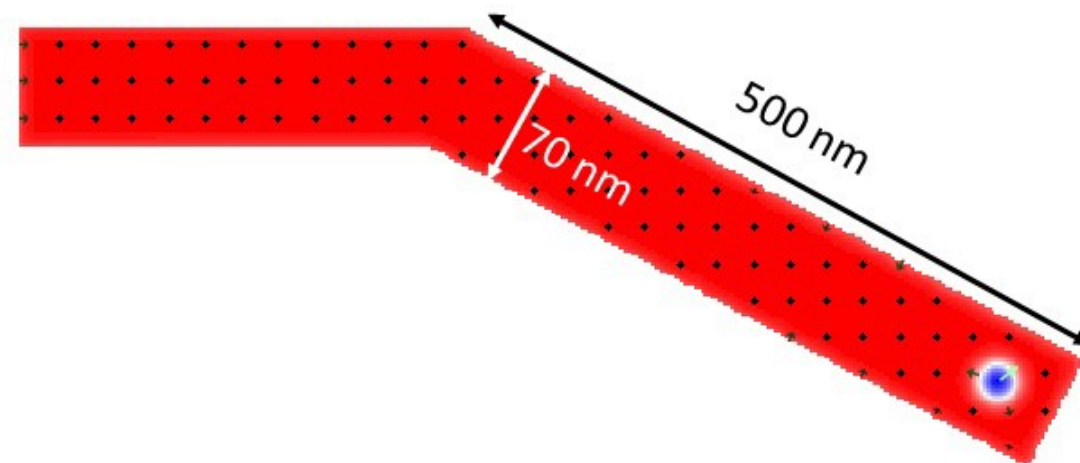

Supplement: d3nr05545k14.pdf [file d3nr05545k14.pdf]

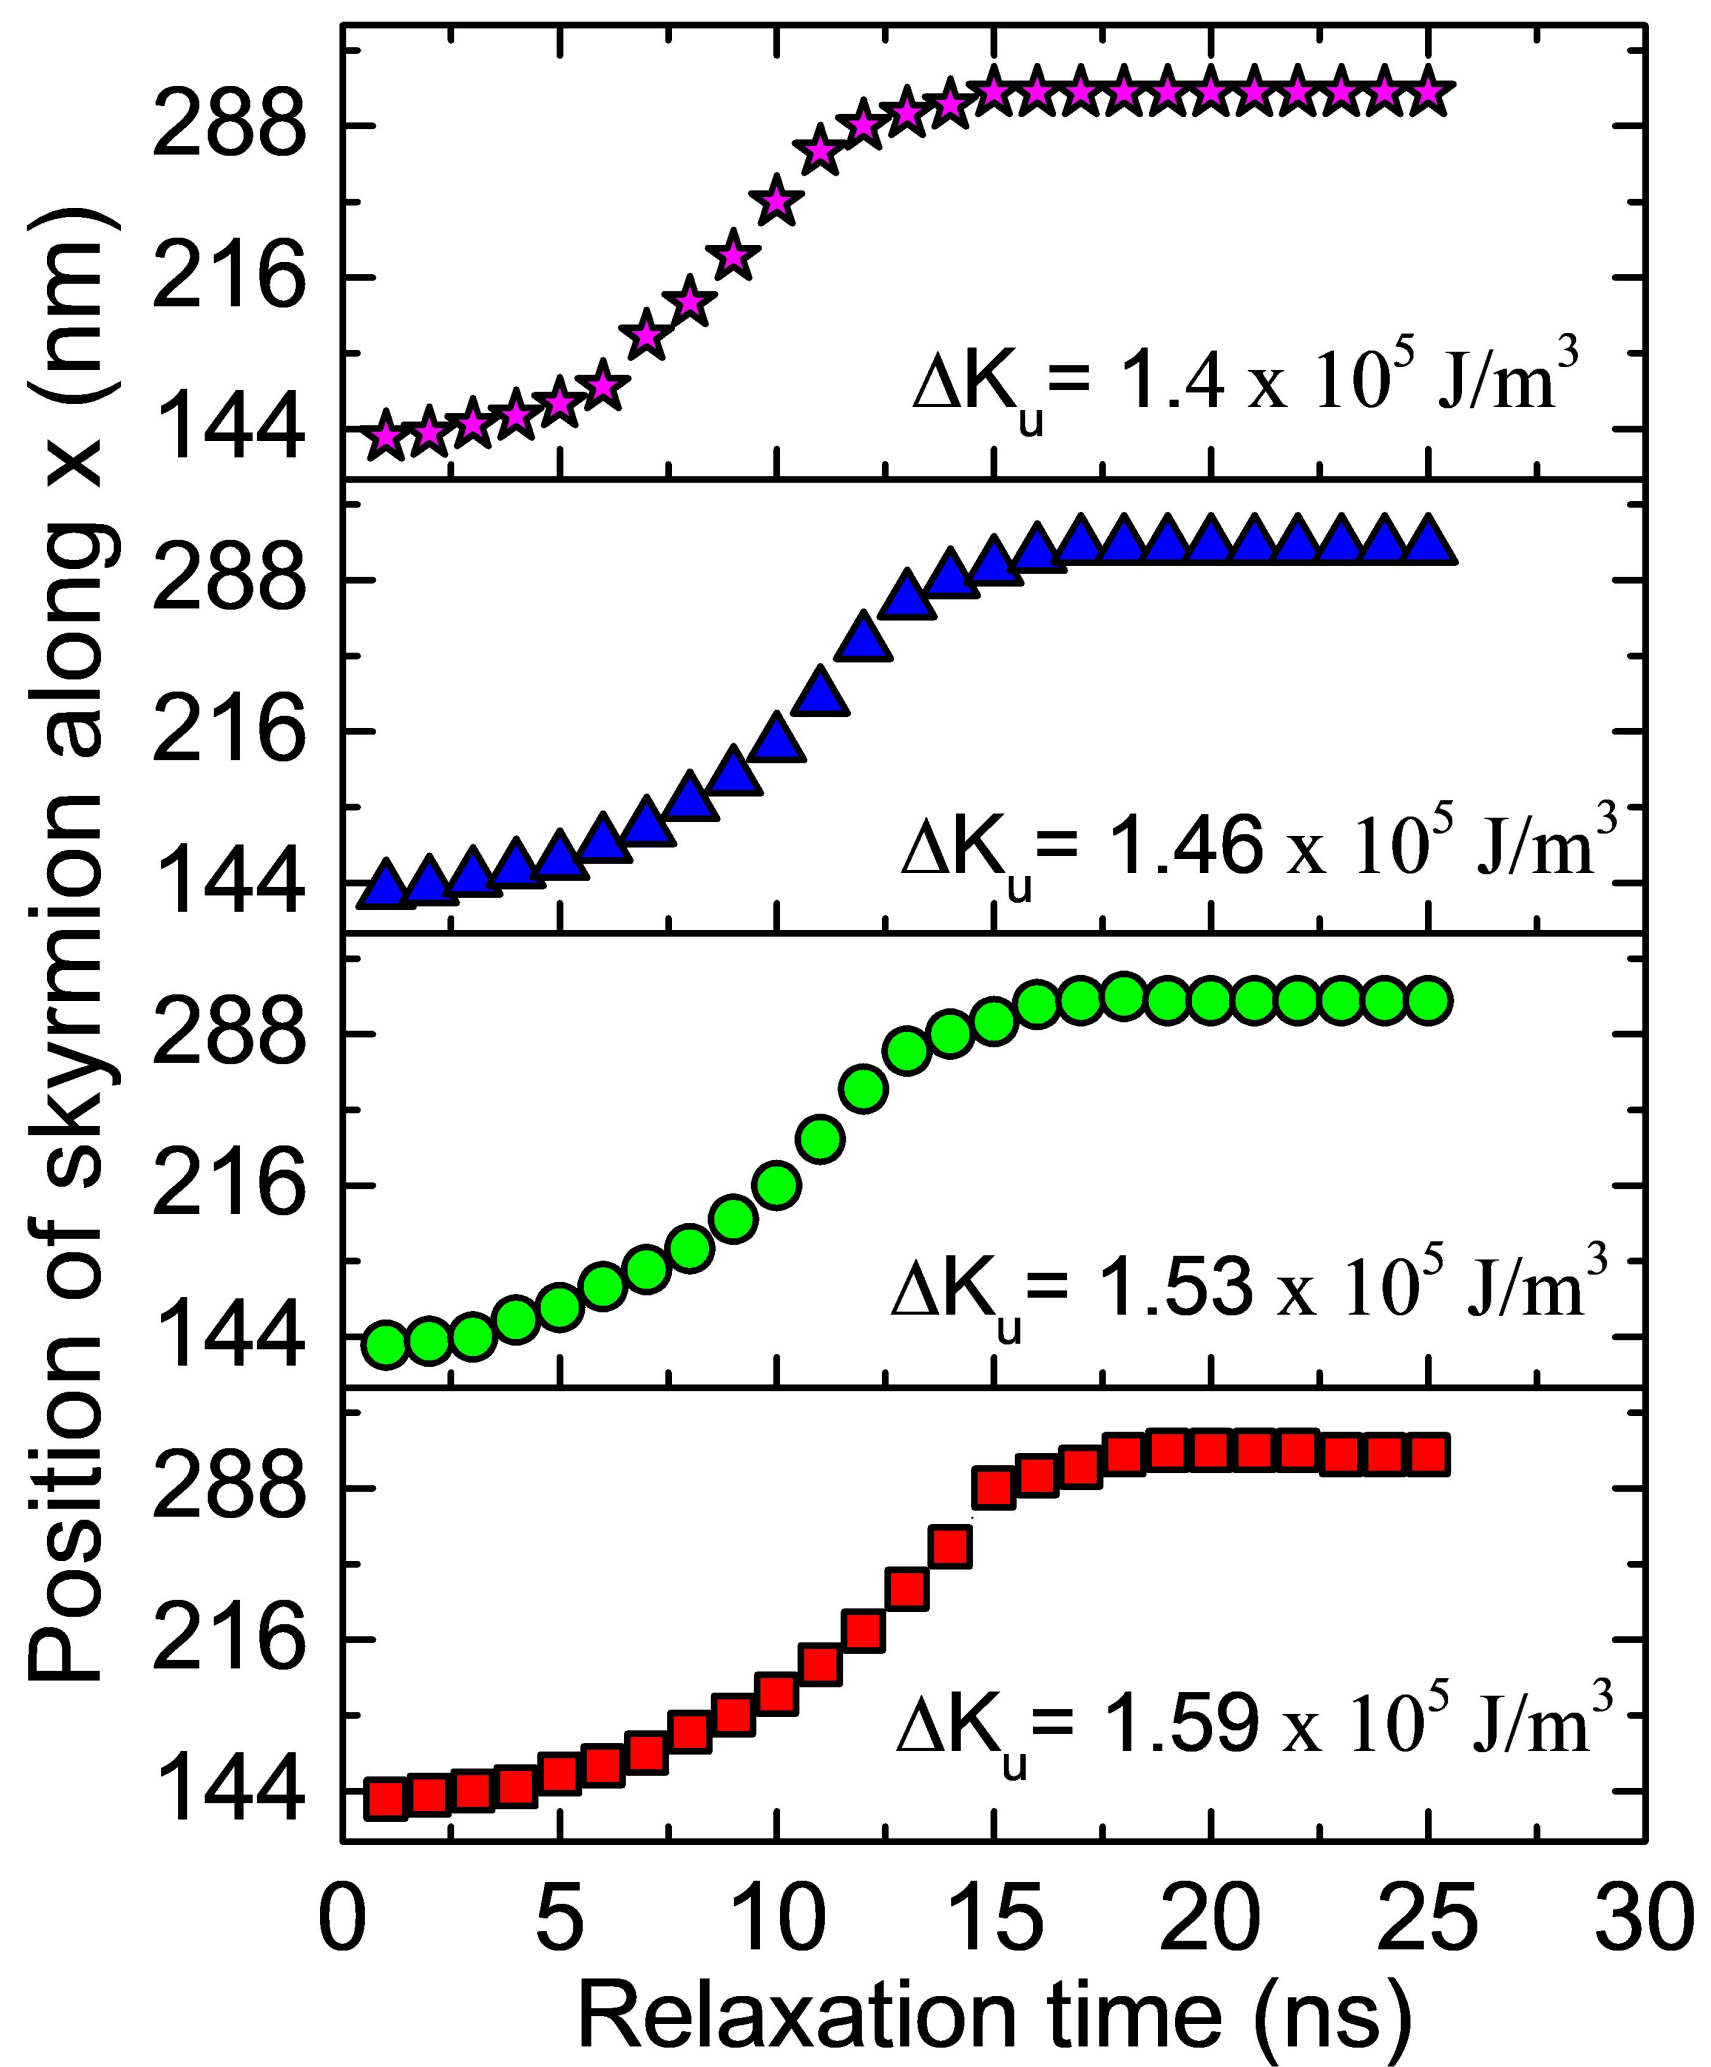

Supplement: d3nr05545k15.pdf [file d3nr05545k15.pdf]

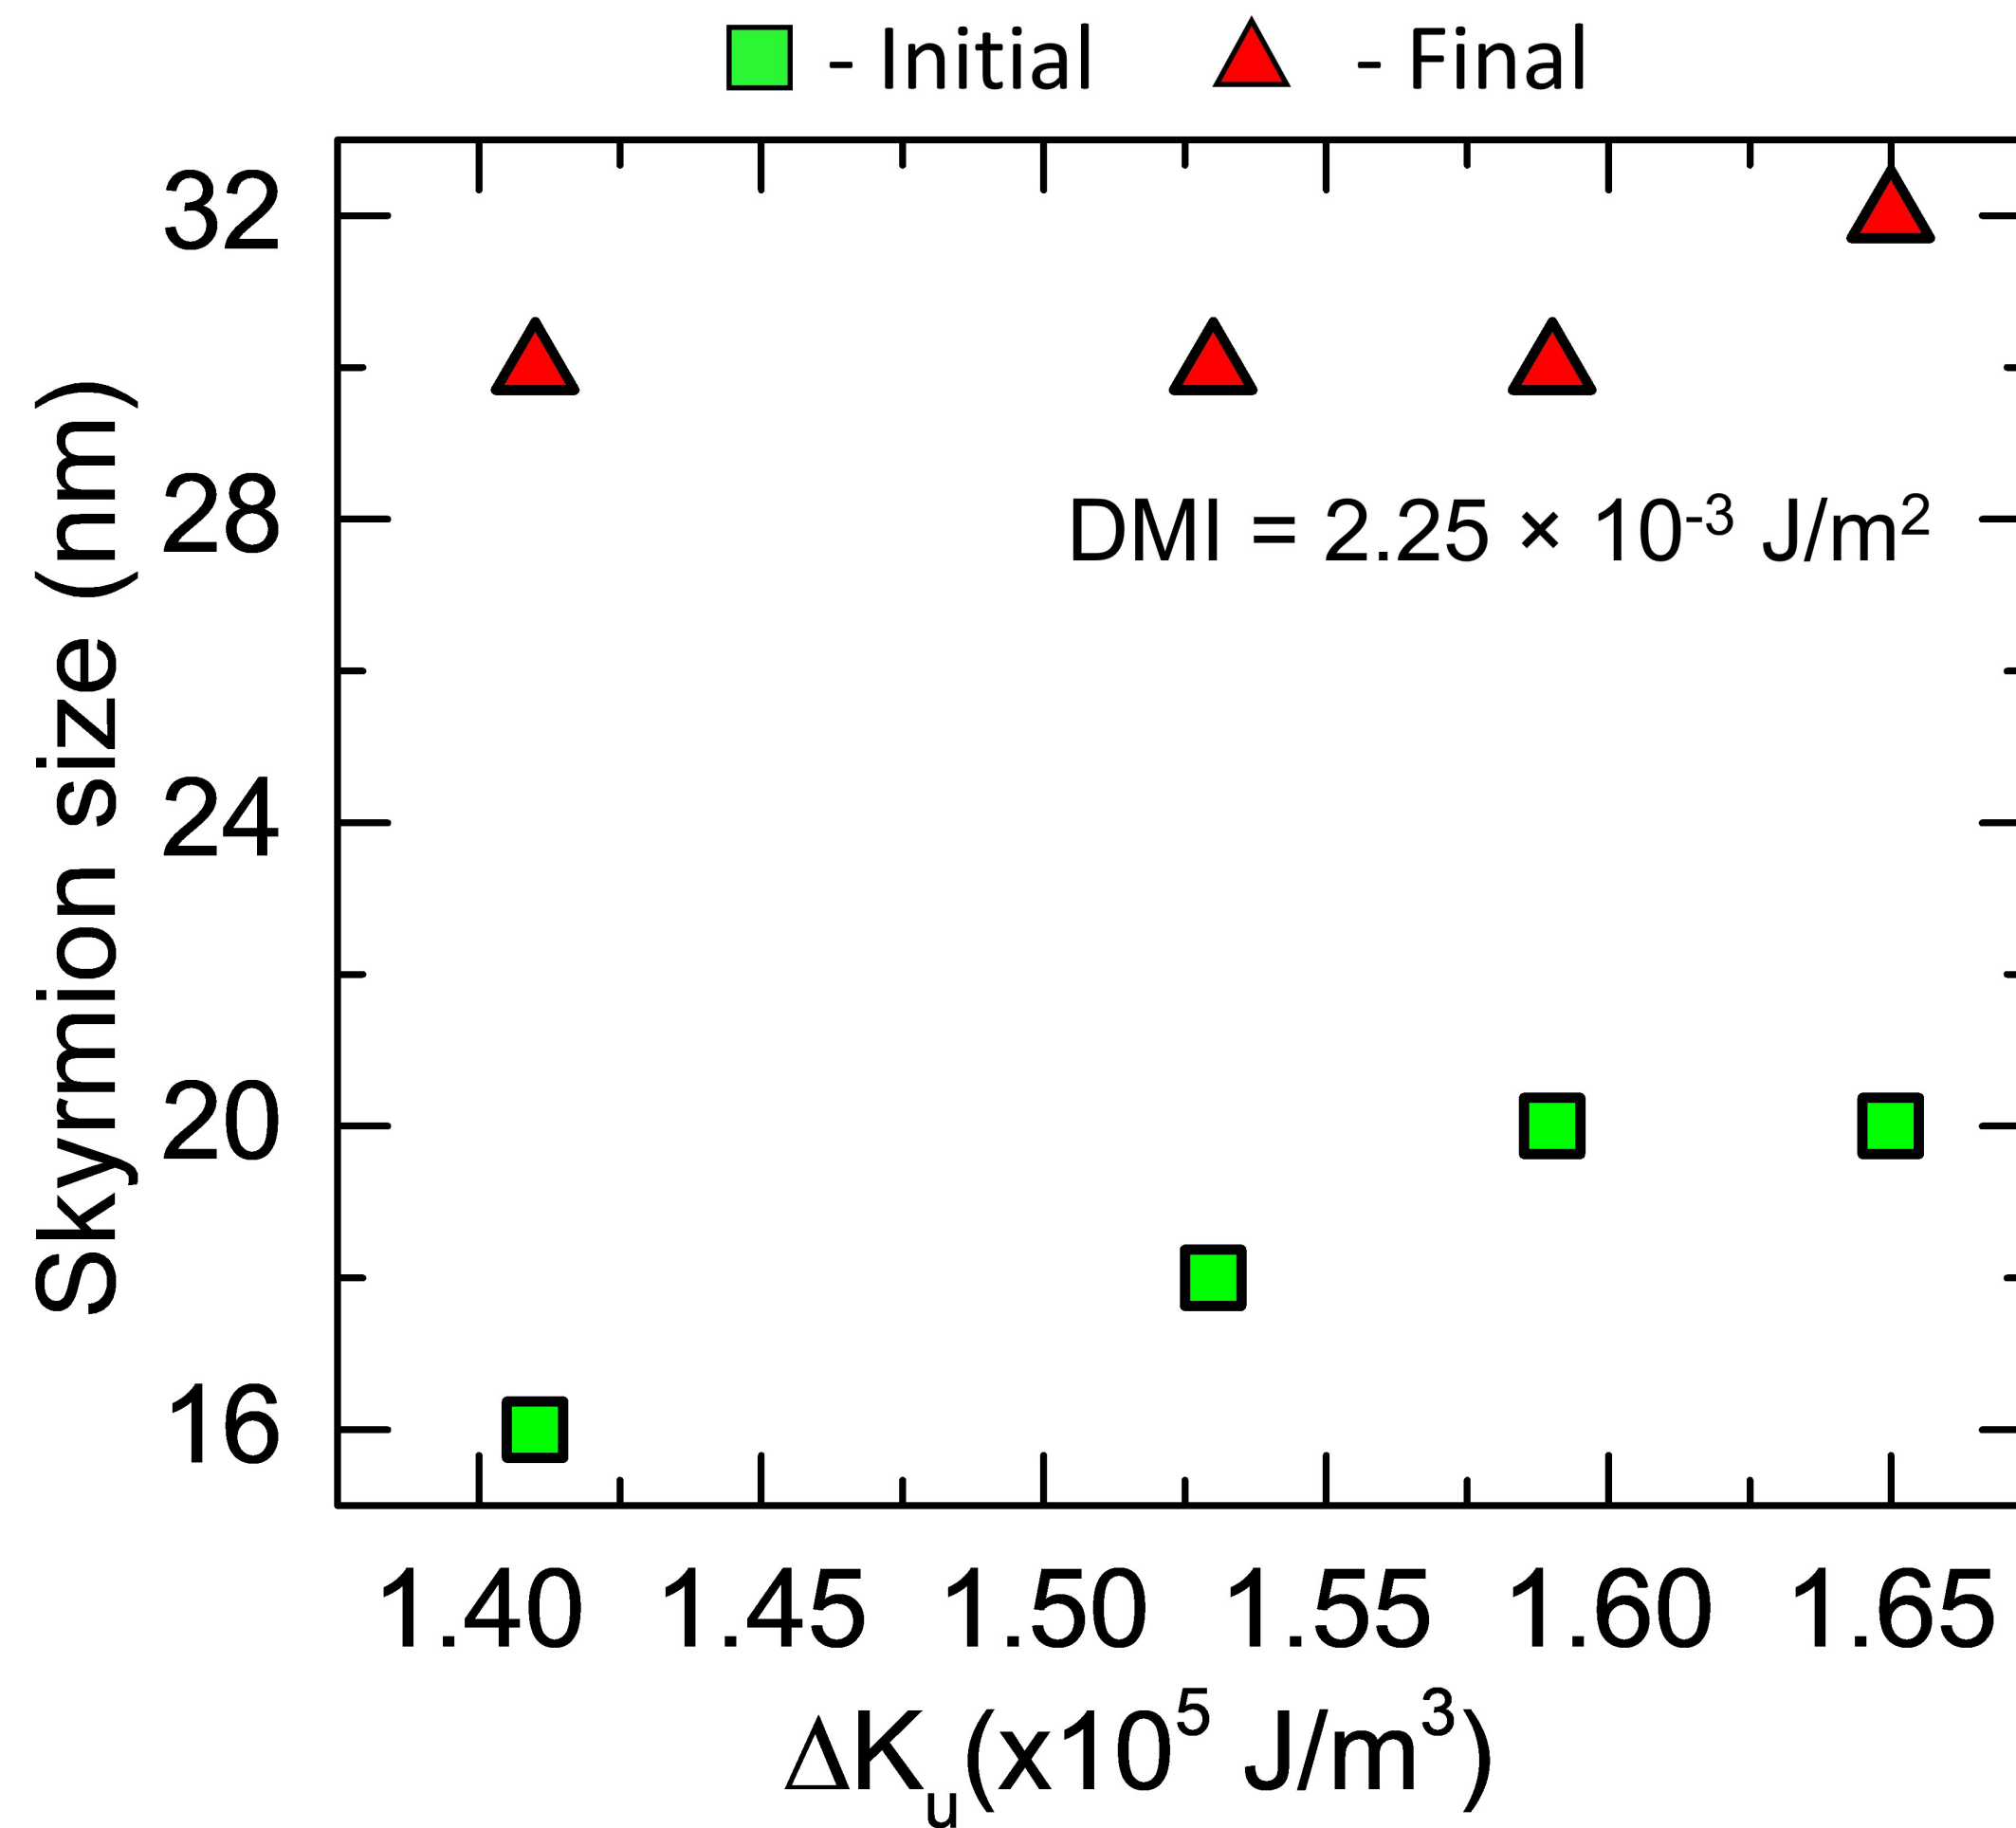

Supplement: d3nr05545k16.pdf [file d3nr05545k16.pdf]

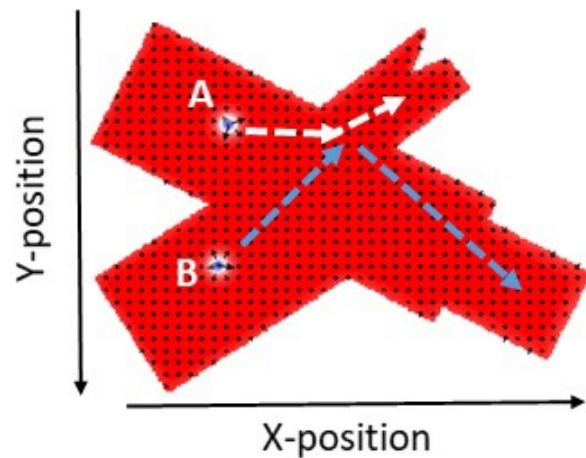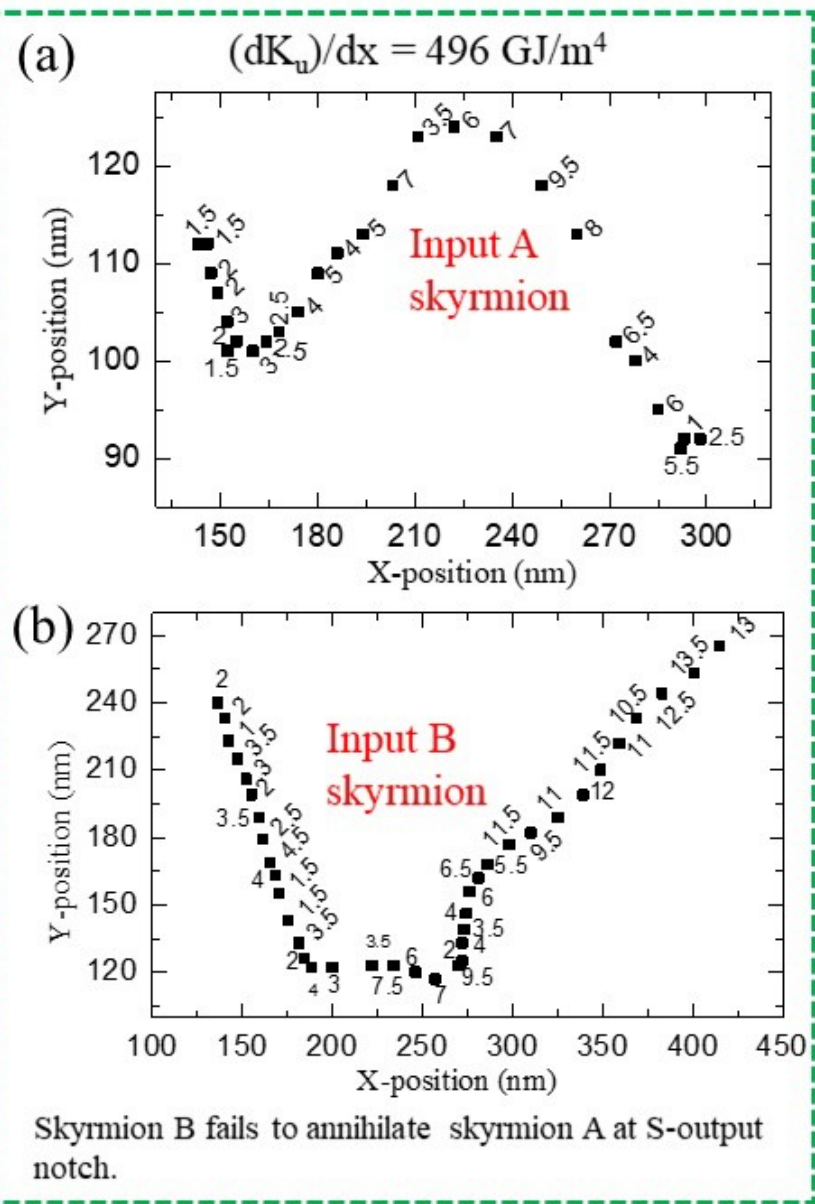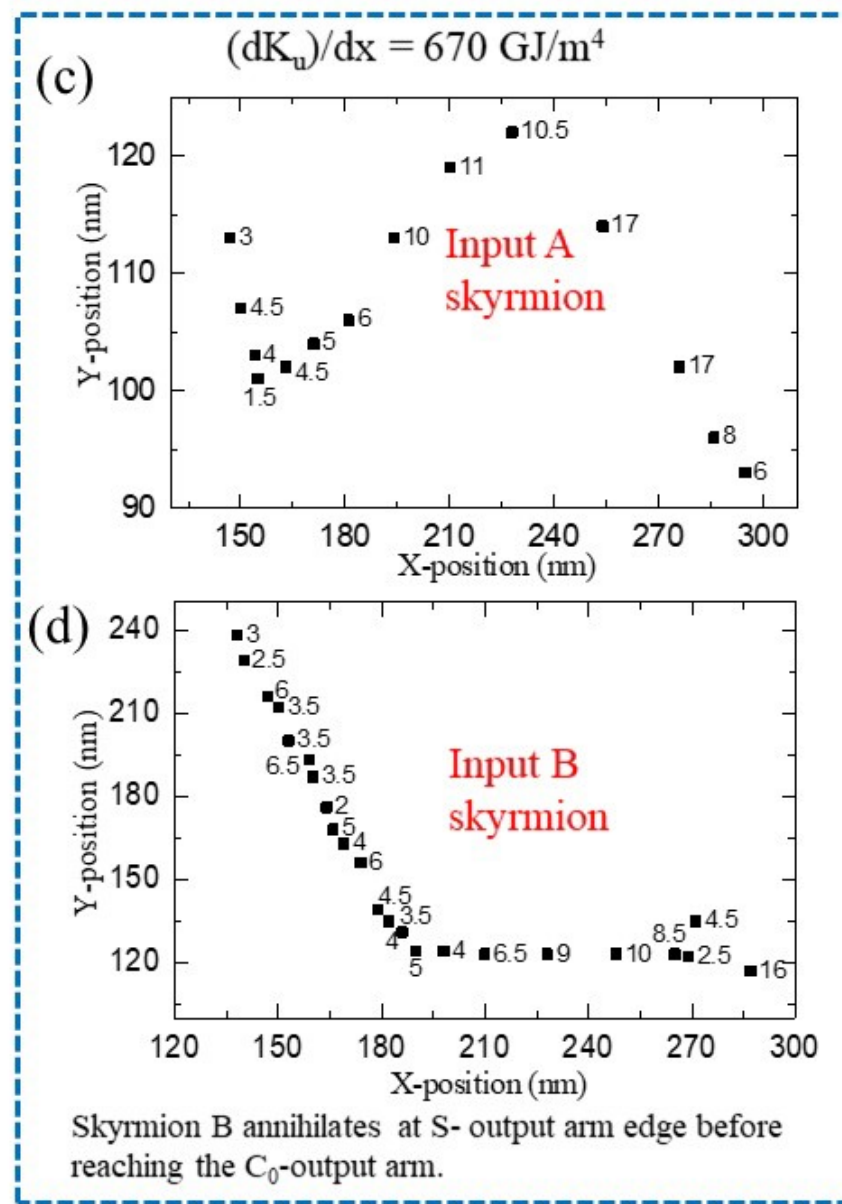

Supplement: d3nr05545k17.pdf [file d3nr05545k17.pdf]

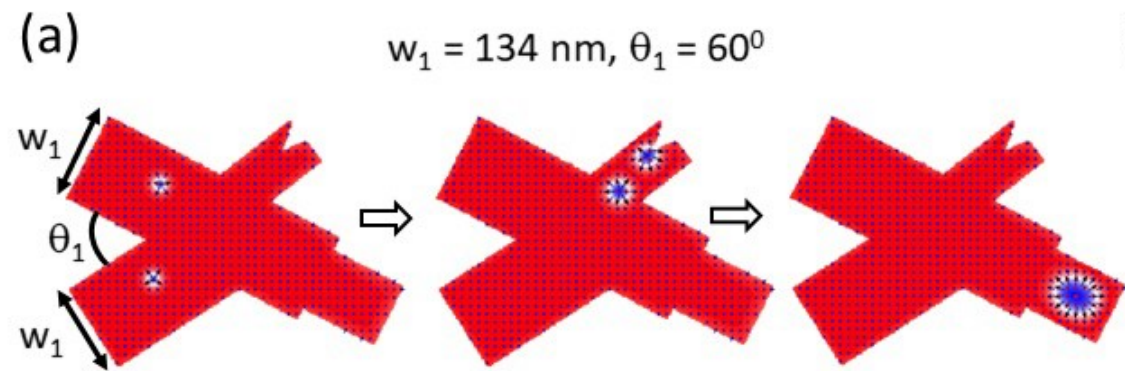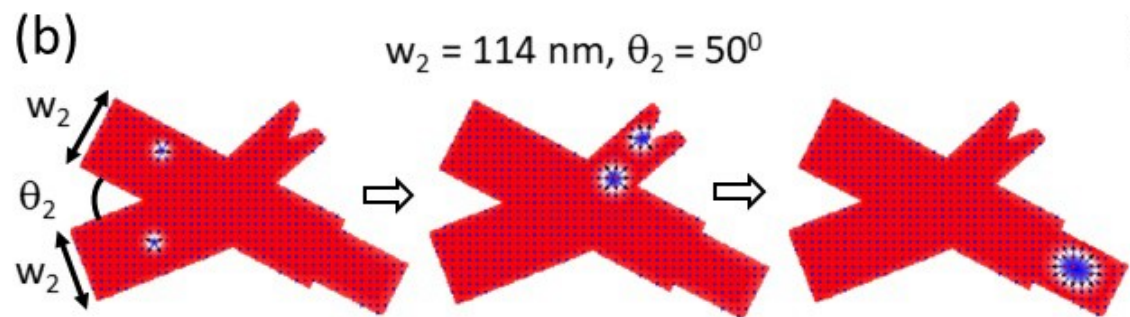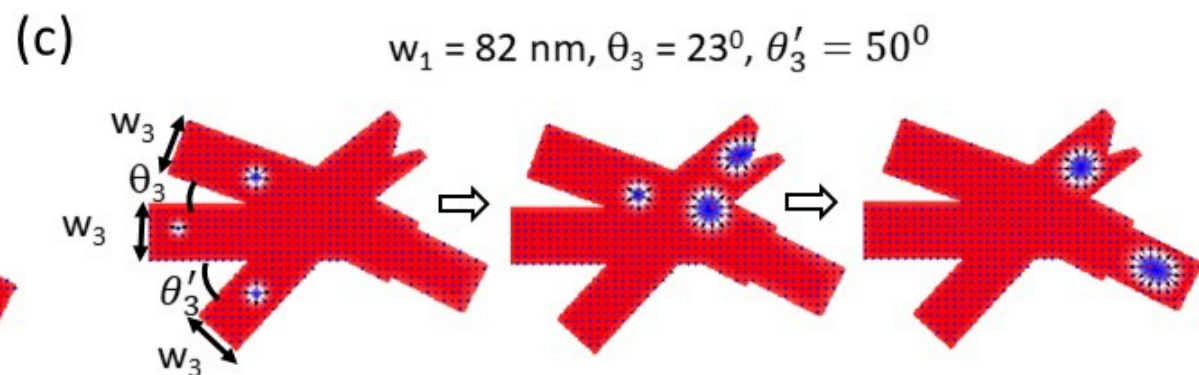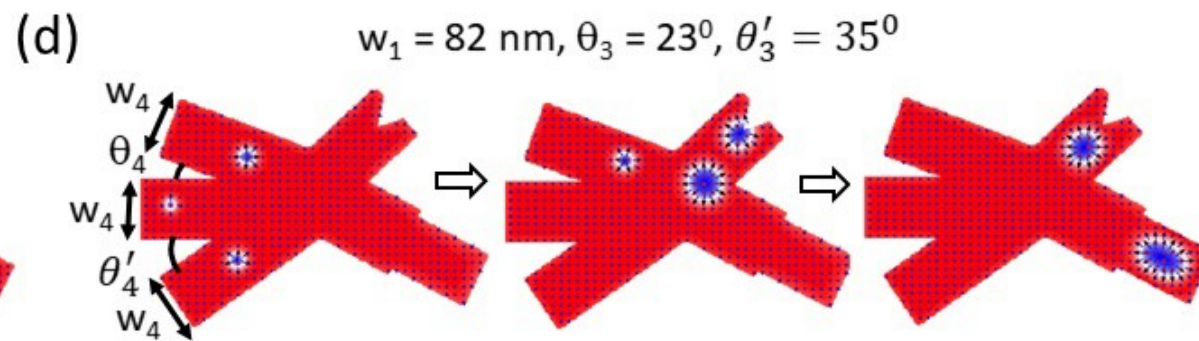

Supplement: d3nr05545k18.pdf [file d3nr05545k18.pdf]

$x_1 = 160 \text{ nm}$ ,  $x_2 = 170 \text{ nm}$ ,  $x_3 = 180 \text{ nm}$

$x_1 = 190 \text{ nm}$ ,  $x_2 = 195 \text{ nm}$ ,  $x_3 = 200 \text{ nm}$

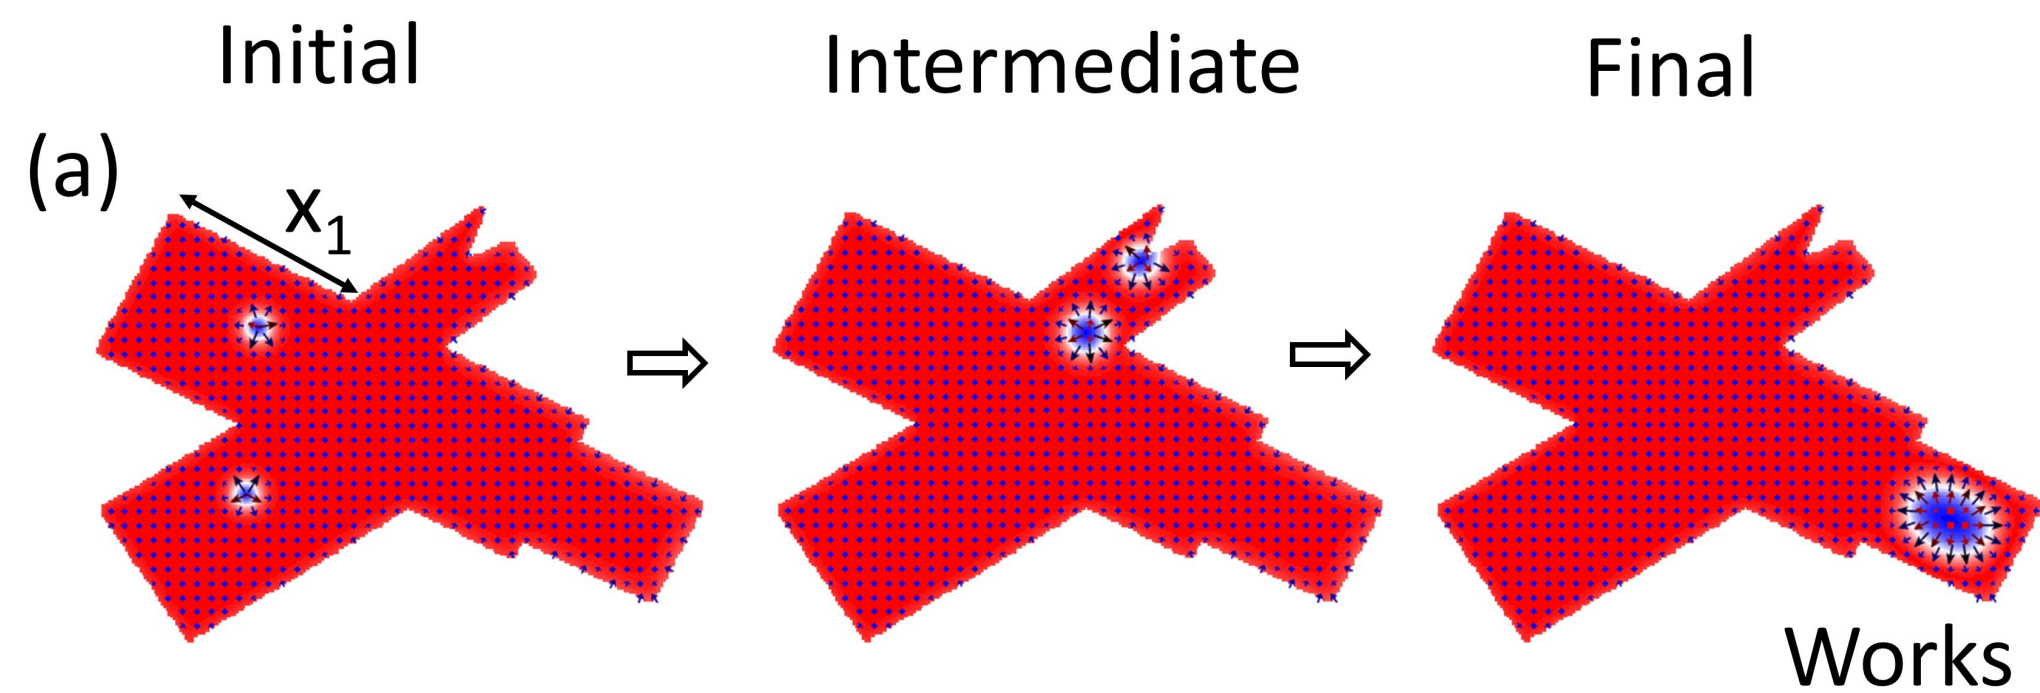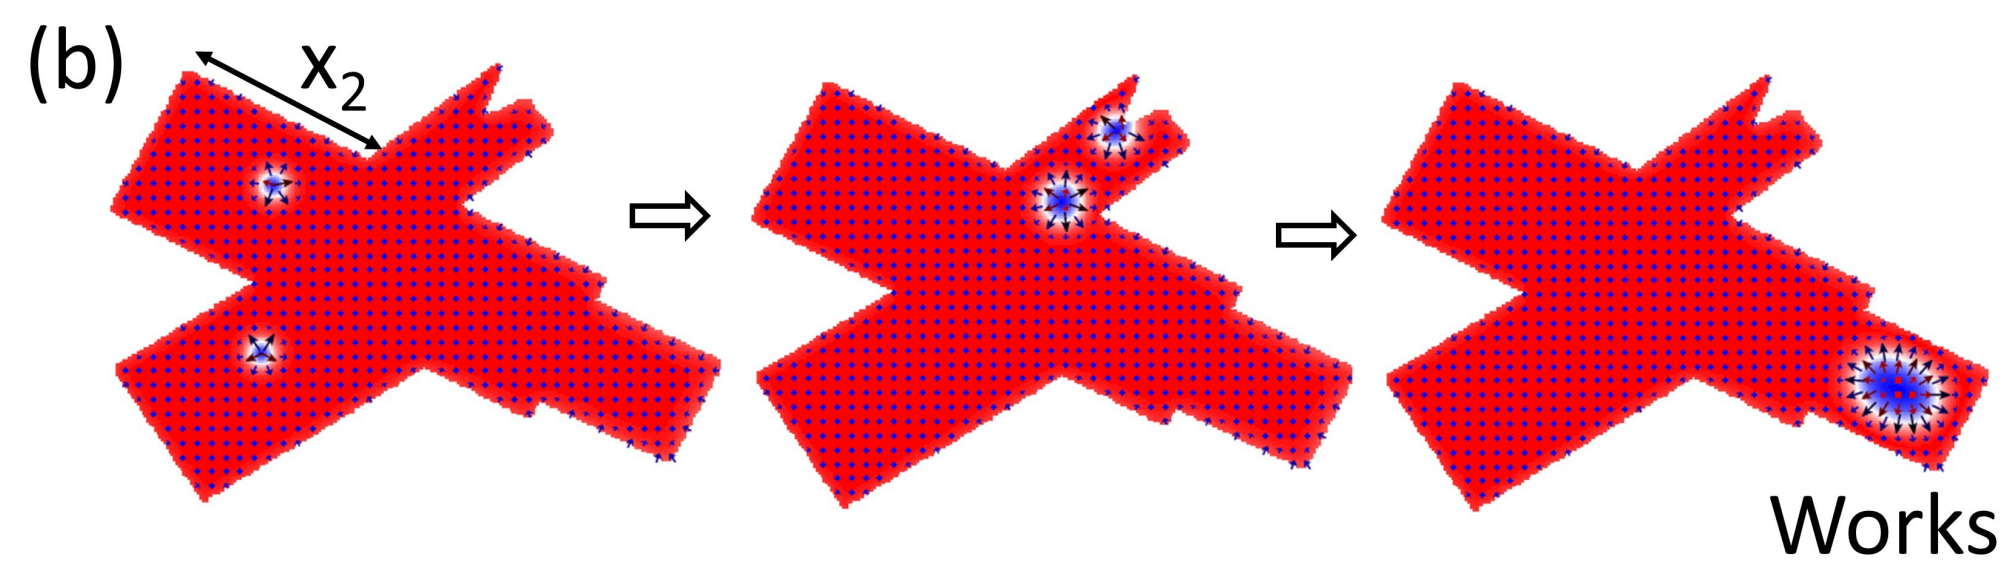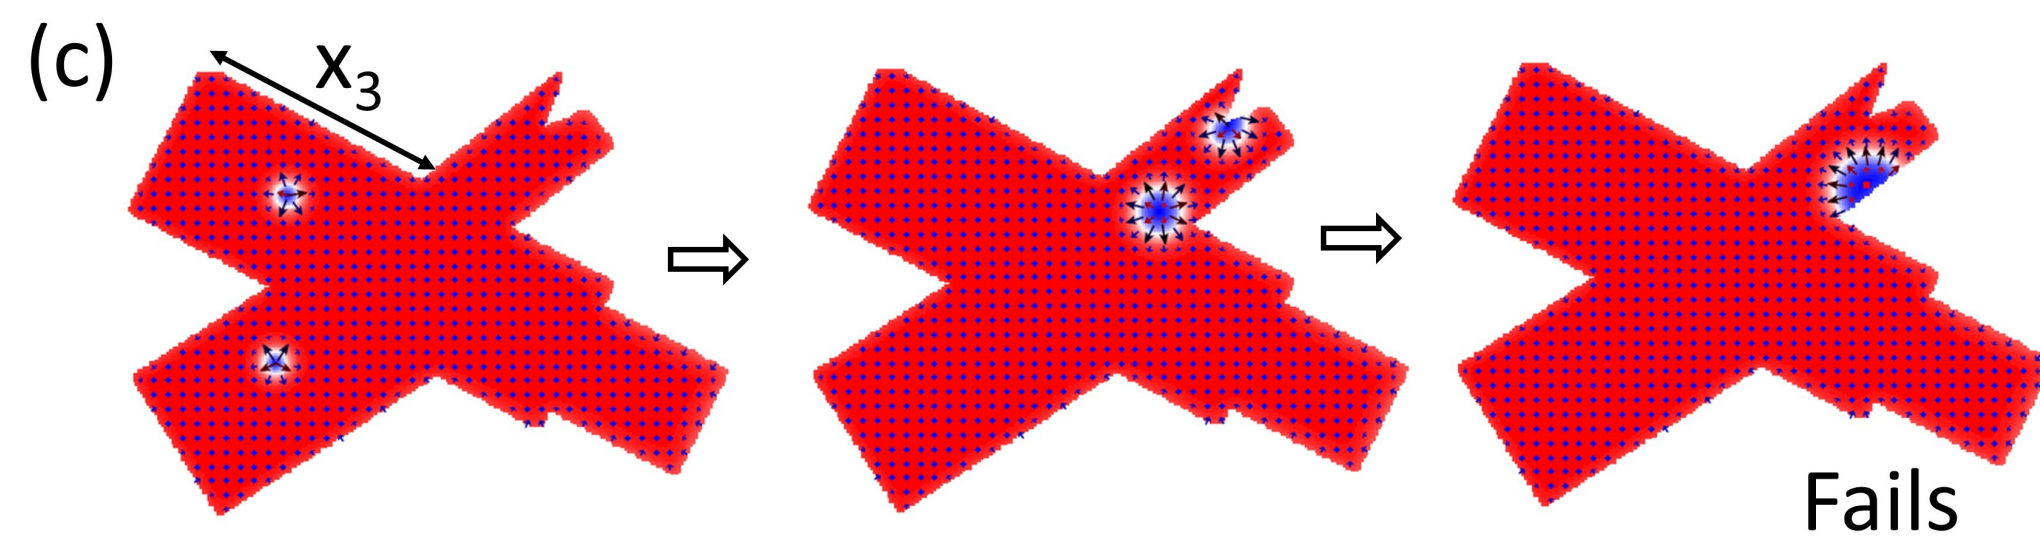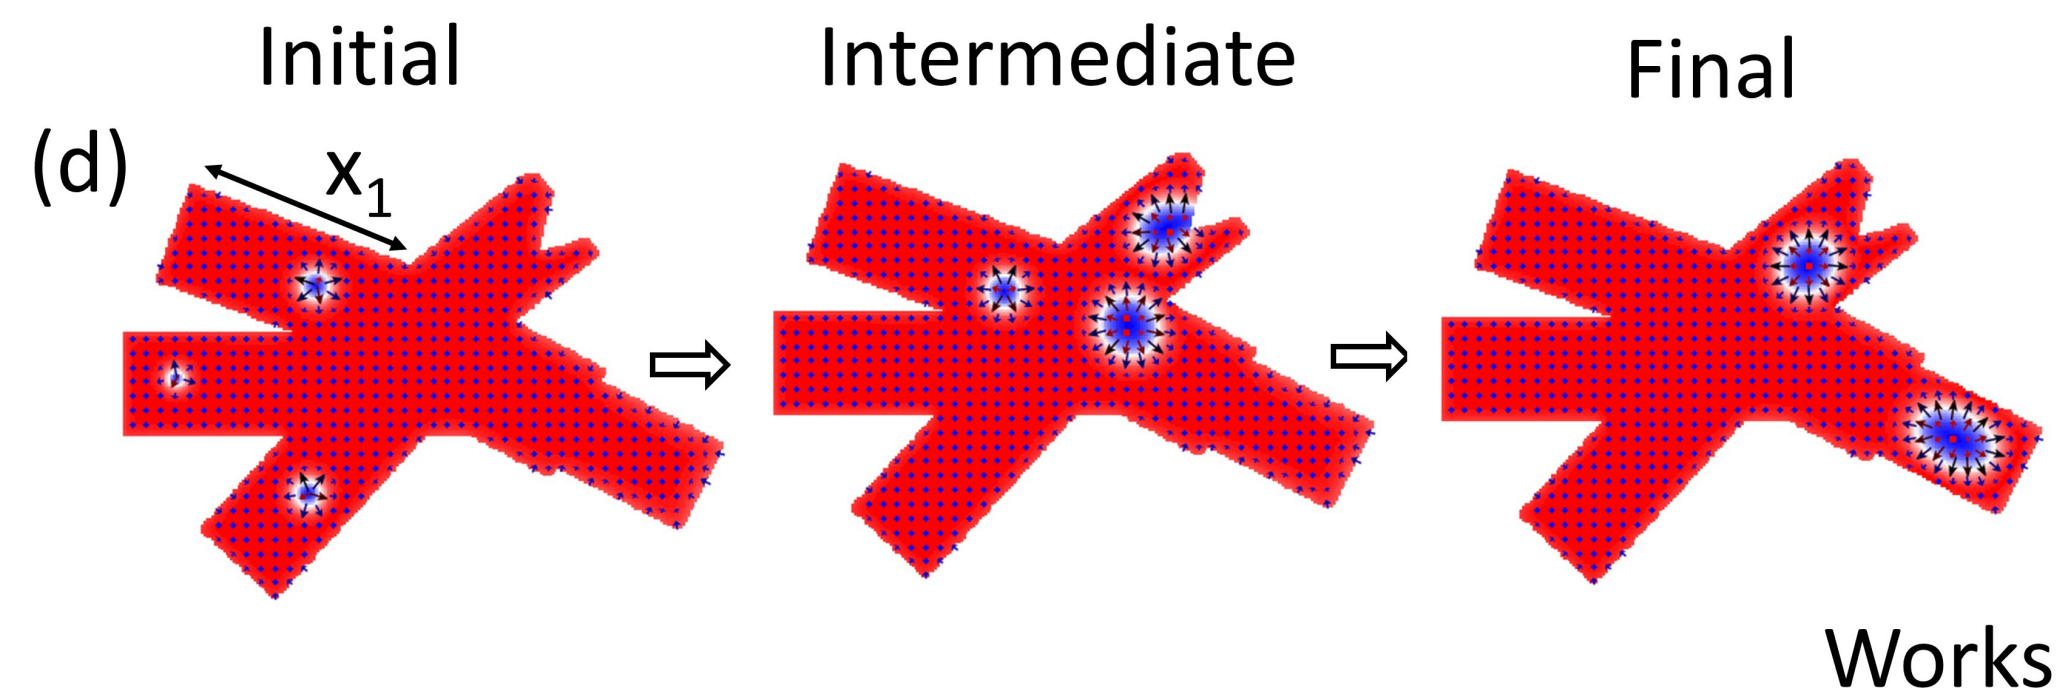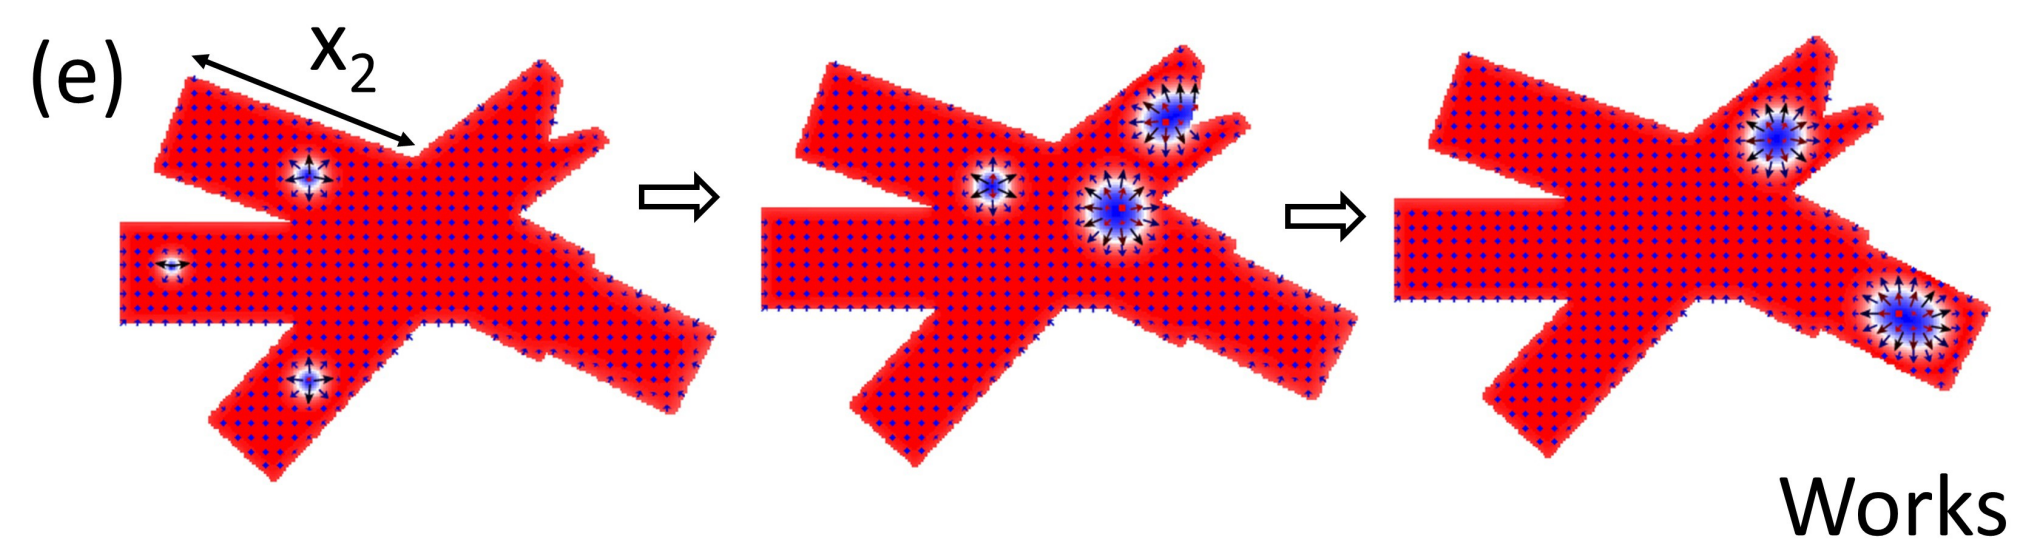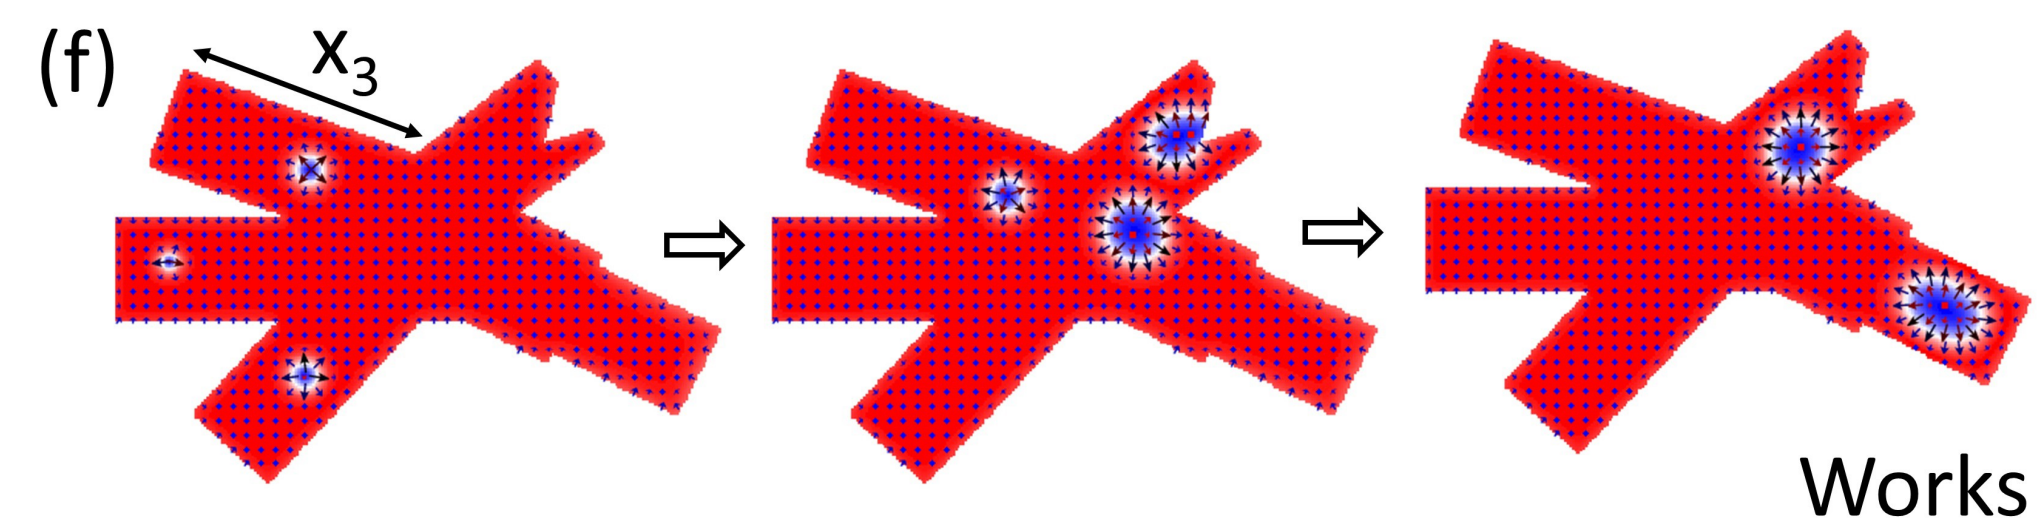

Supplement: d3nr05545k19.pdf [file d3nr05545k19.pdf]

$y_1 = 135 \text{ nm}$ ,  $y_2 = 150 \text{ nm}$ ,  $y_3 = 165 \text{ nm}$

$y_1 = 145 \text{ nm}$ ,  $y_2 = 150 \text{ nm}$ ,  $y_3 = 155 \text{ nm}$

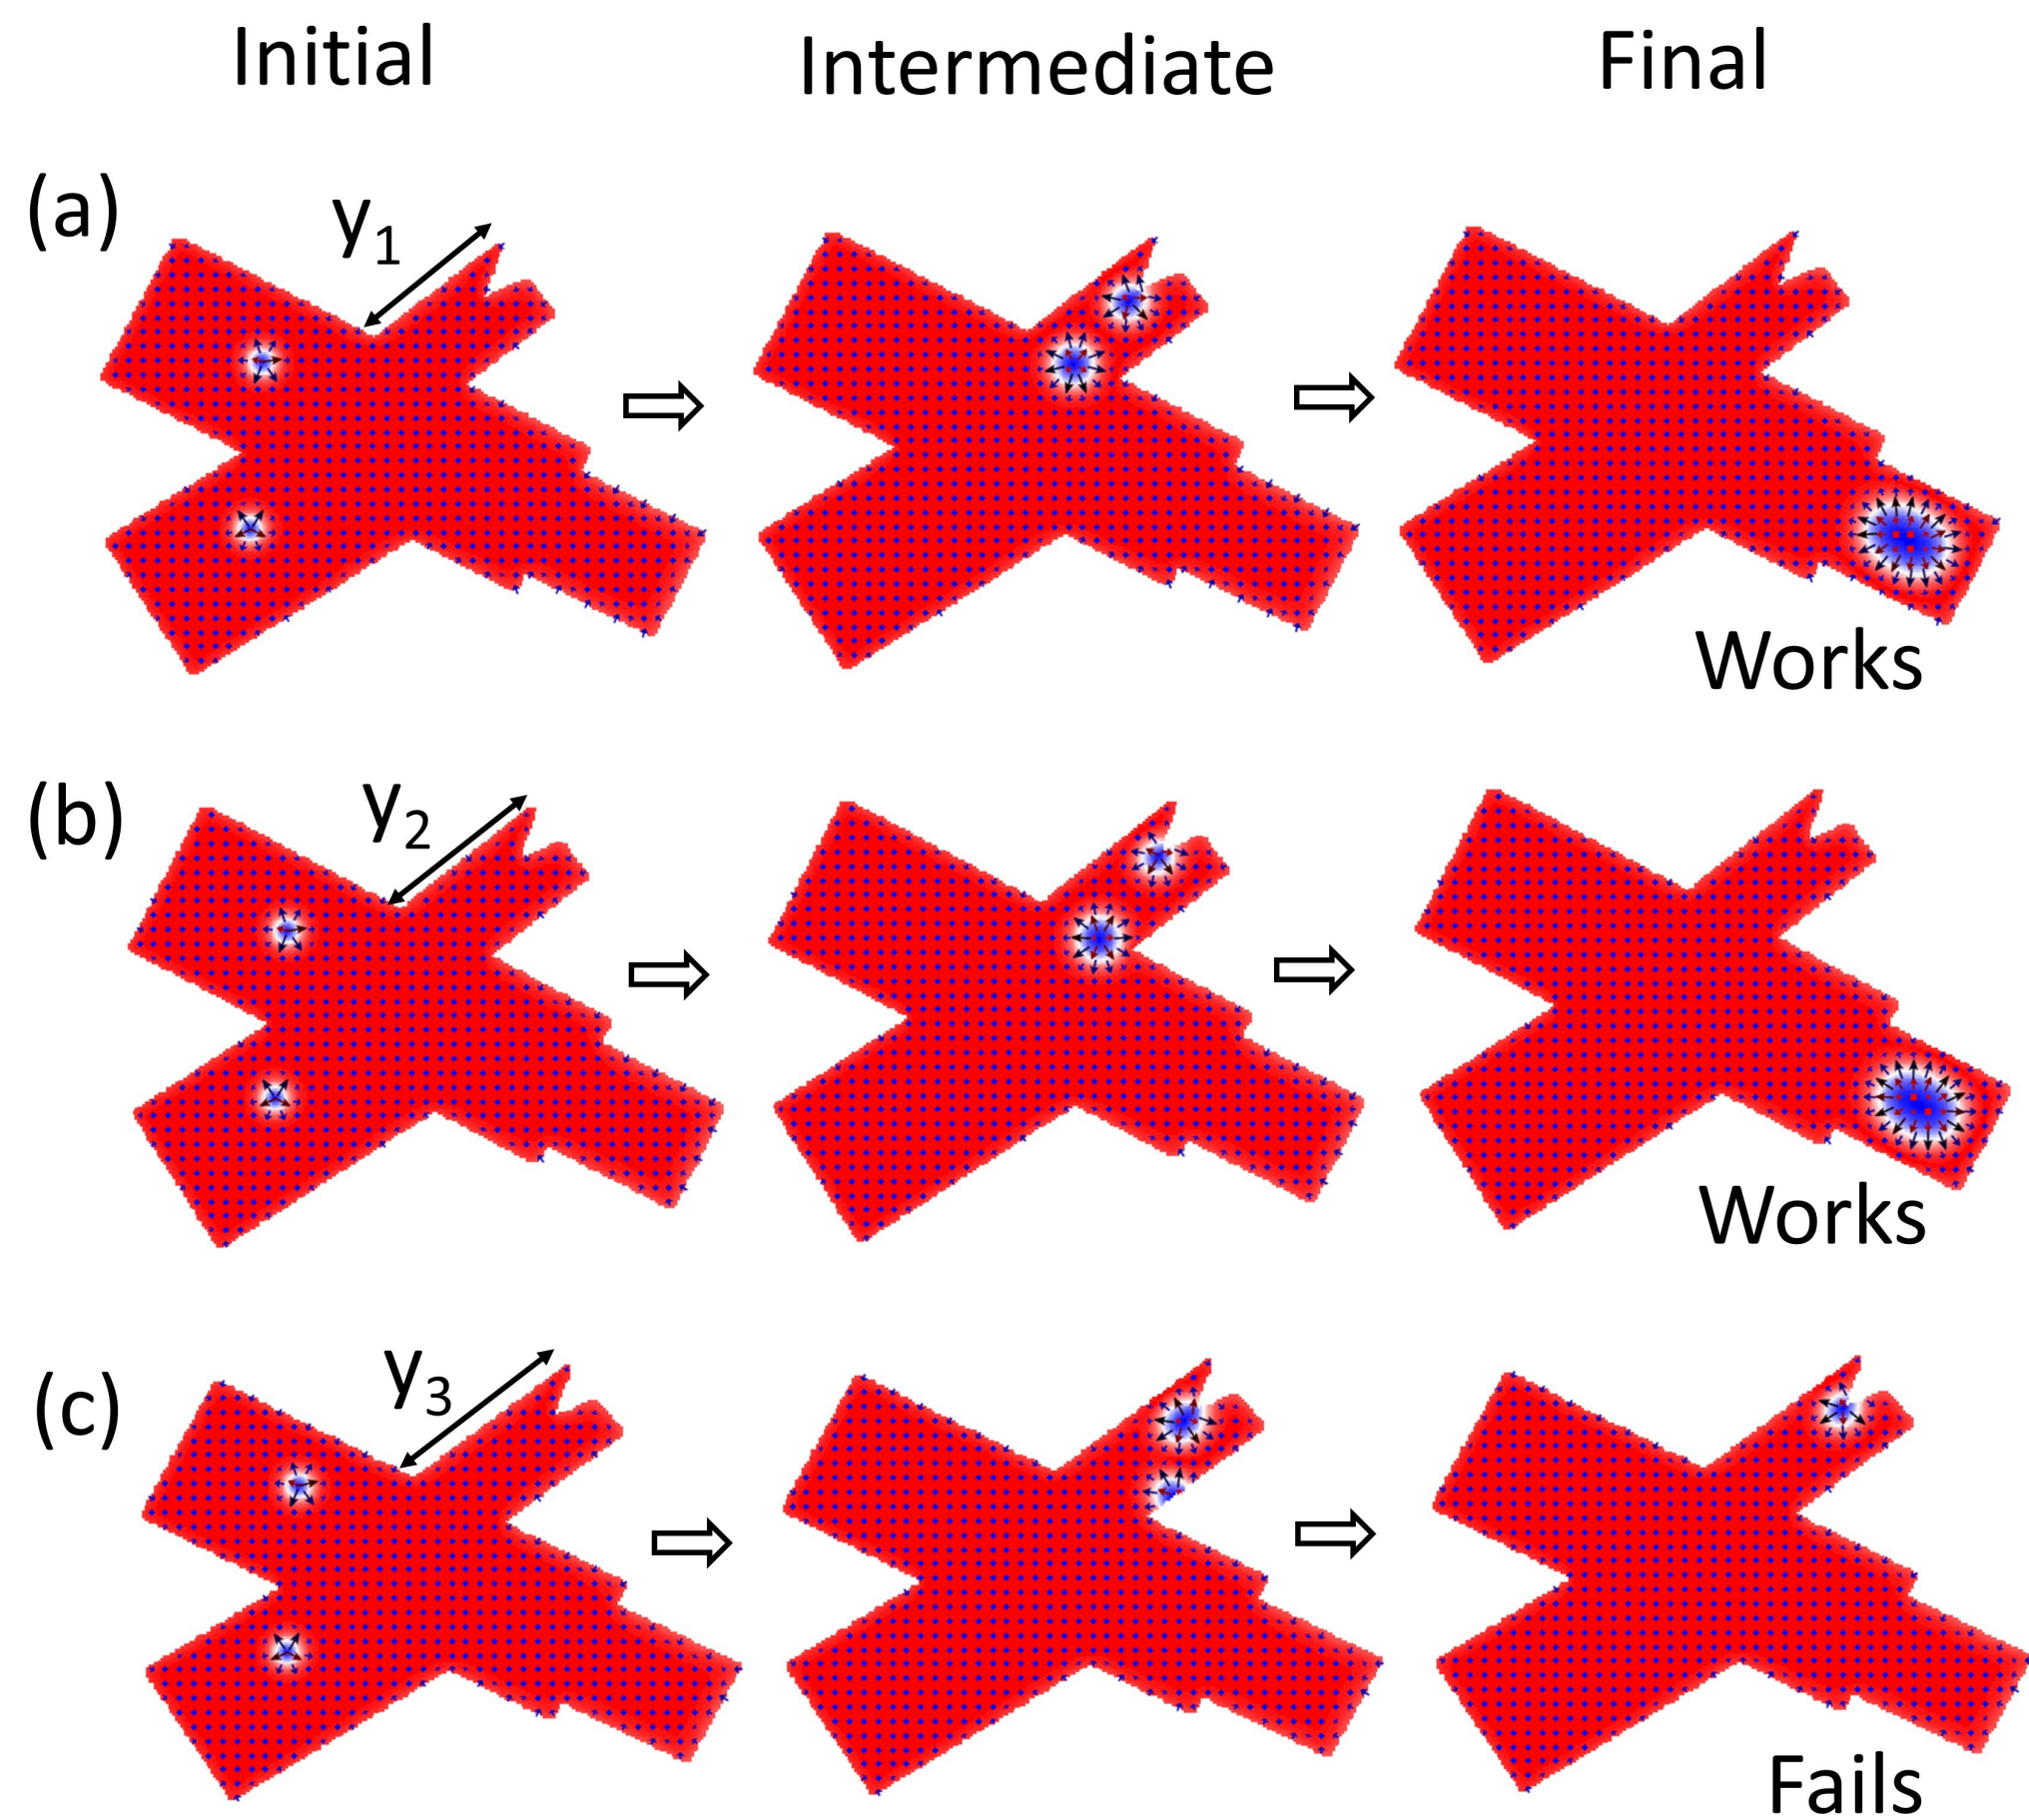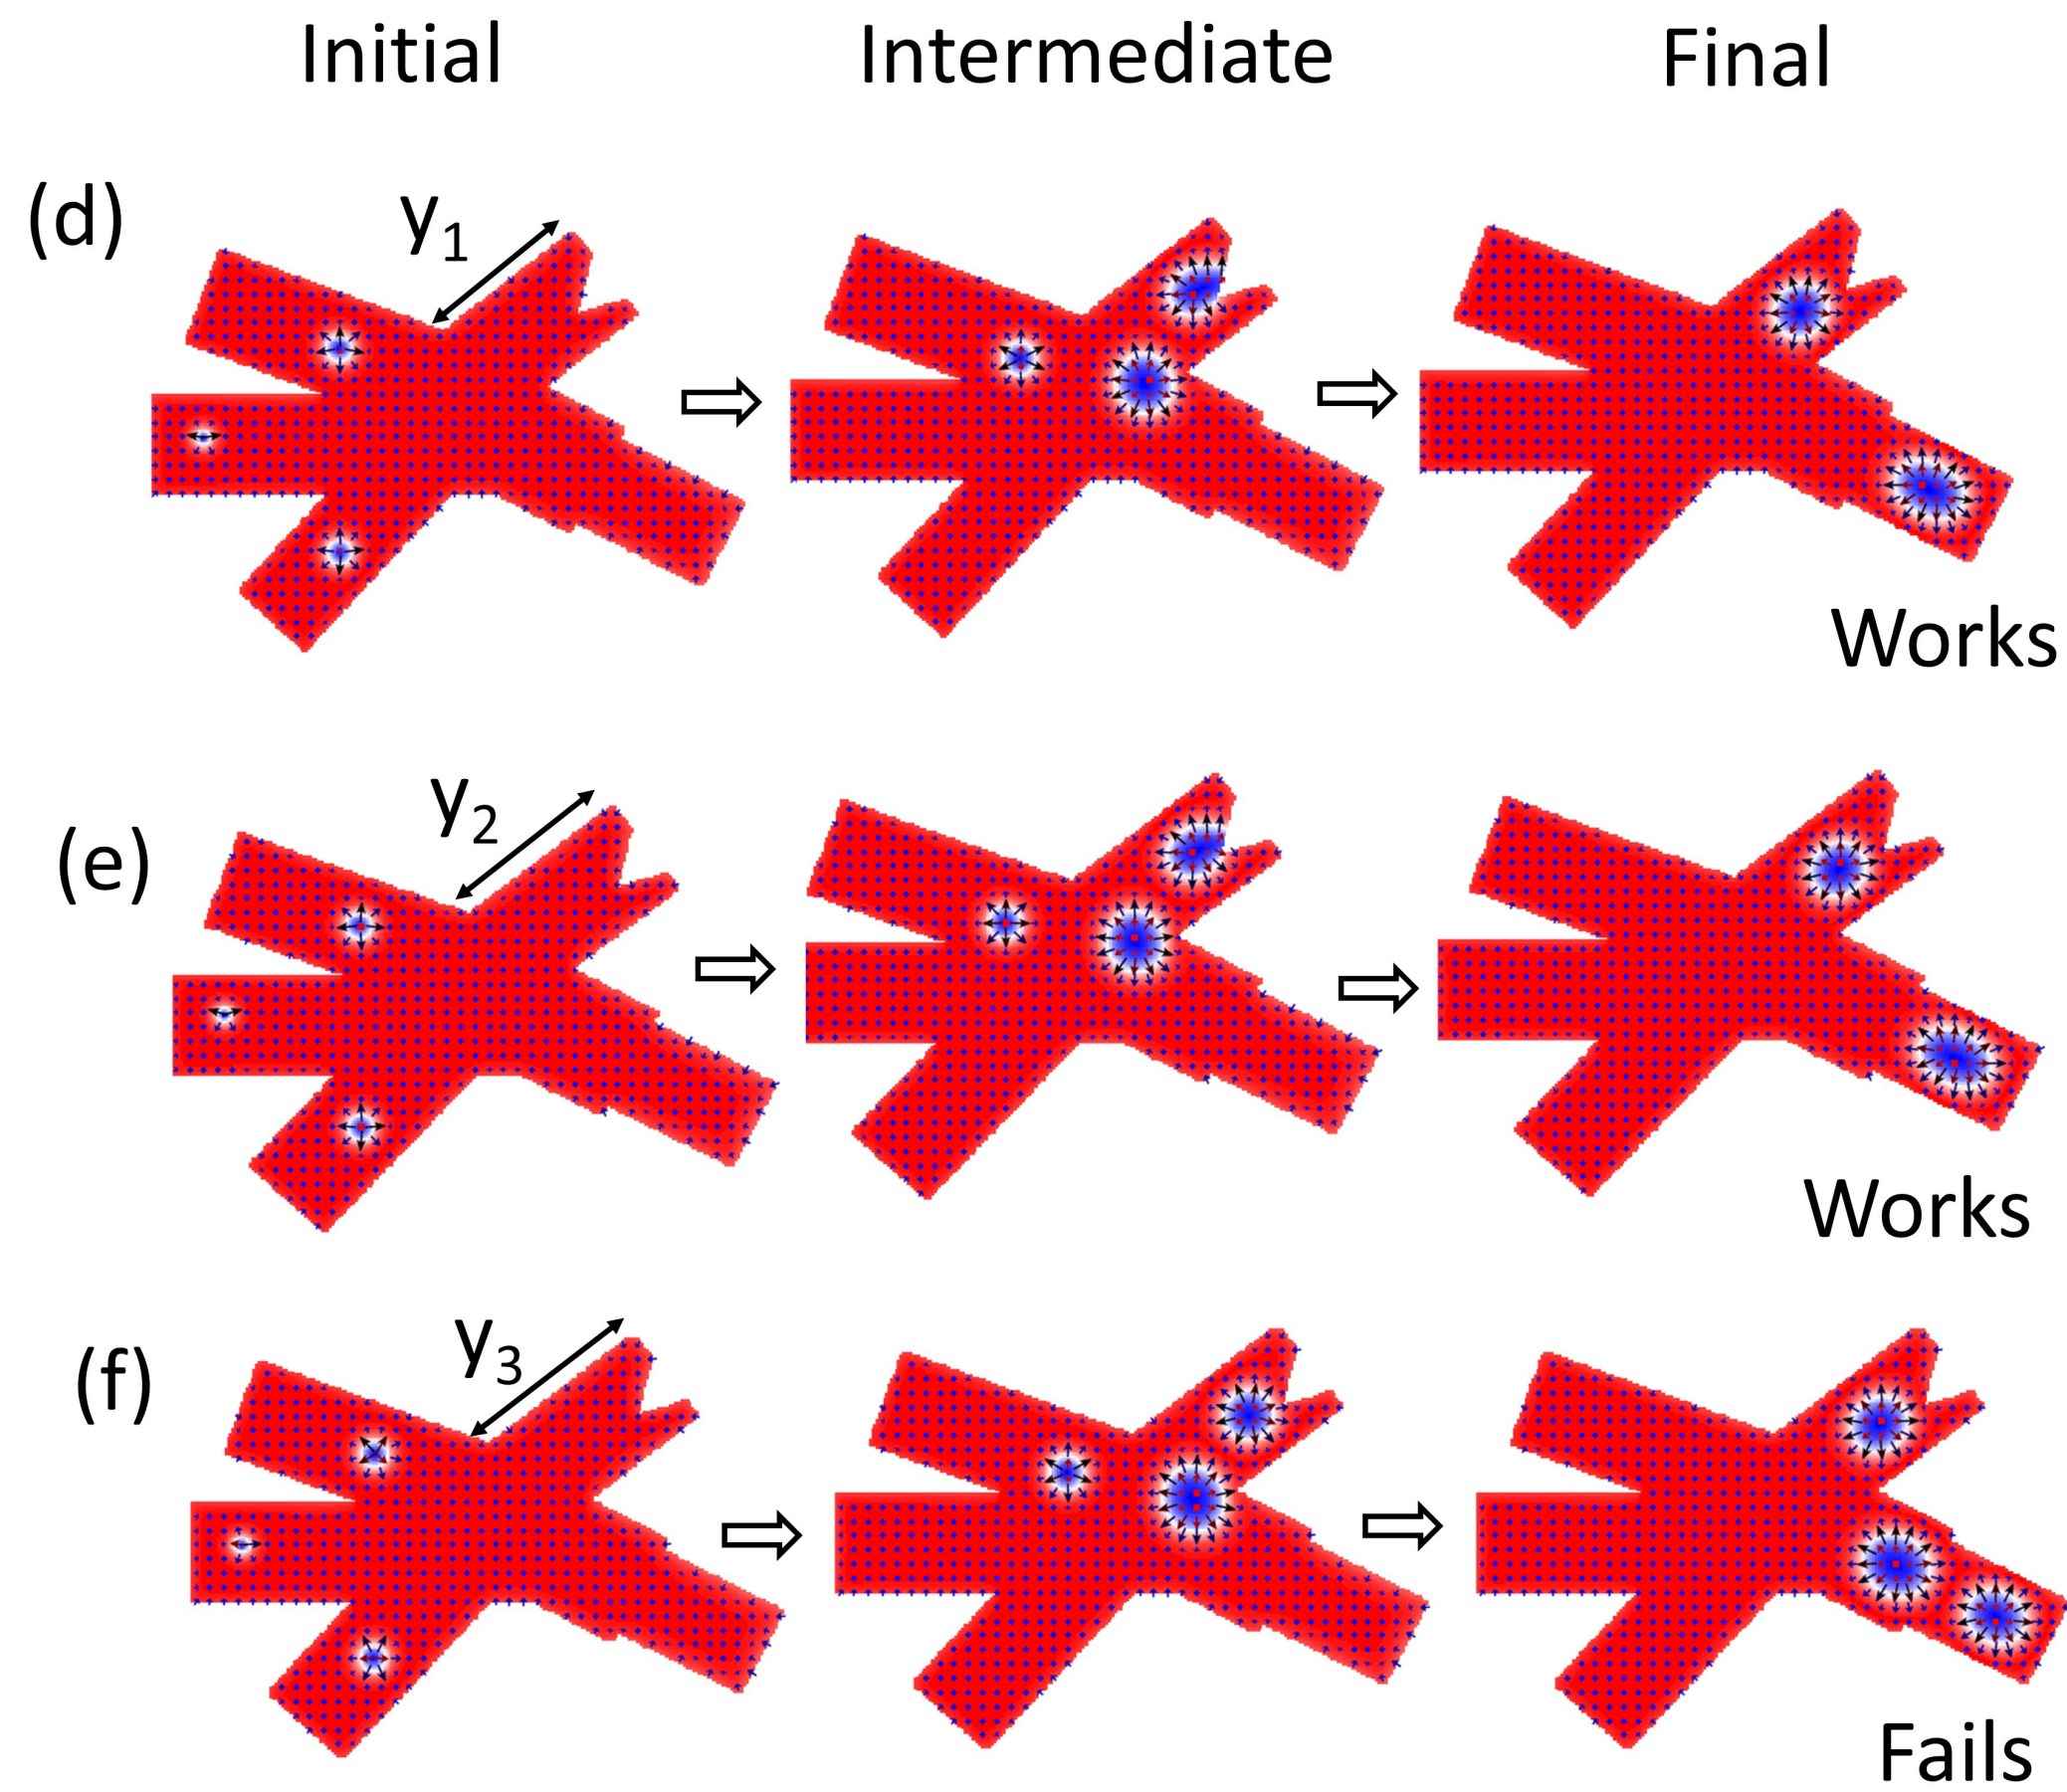

Supplement: d3nr05545k20.pdf [file d3nr05545k20.pdf]

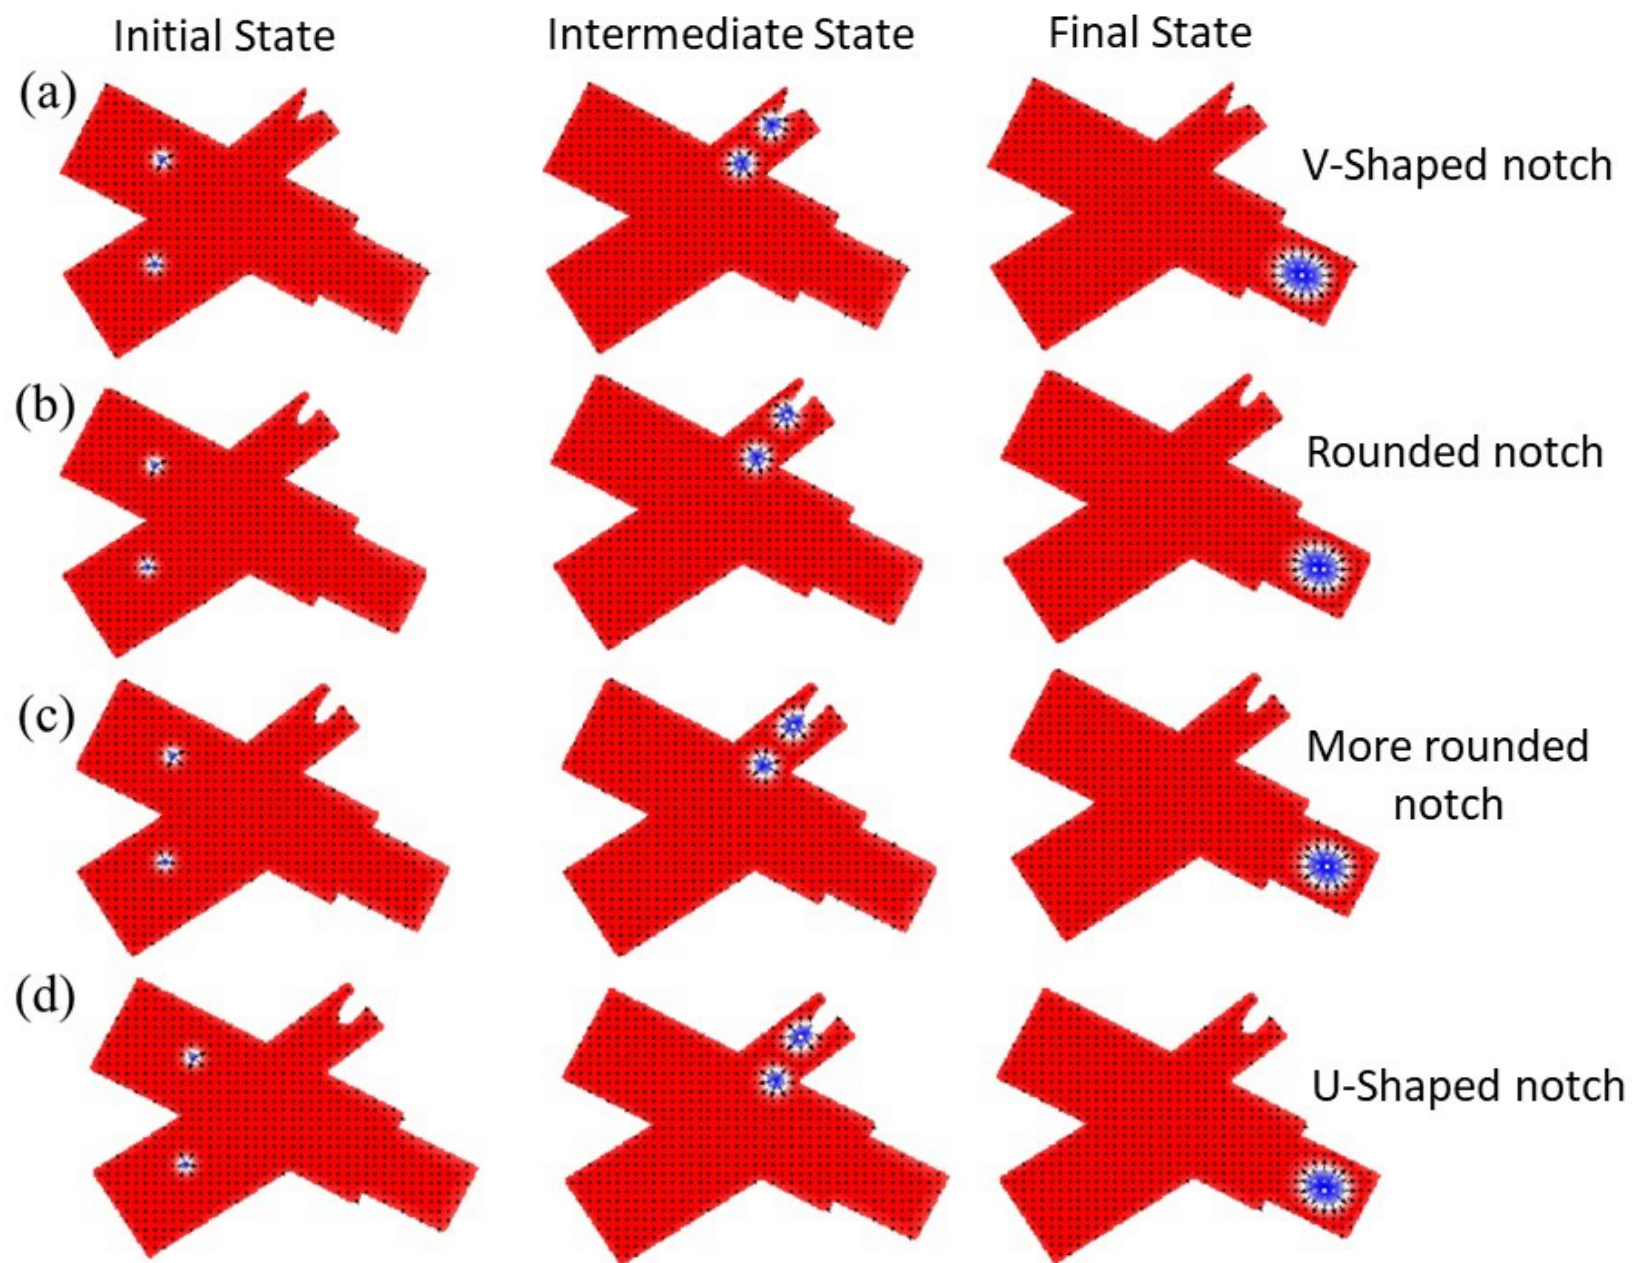

Supplement: d3nr05545k23.pdf [file d3nr05545k23.pdf]

Initial state

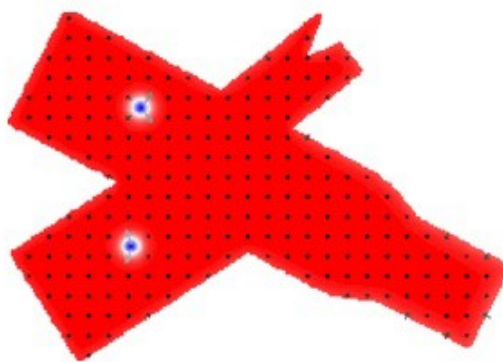

Intermediate state

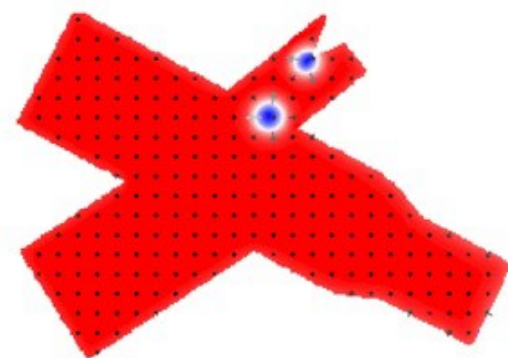

Final state

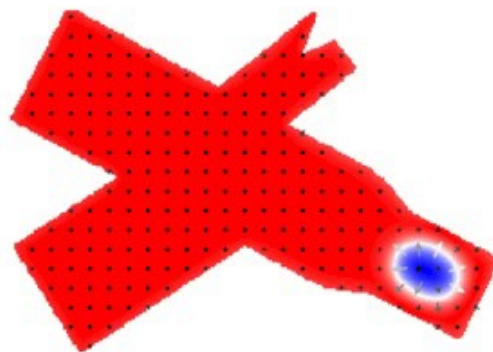

Supplement: d3nr05545k24.pdf [file d3nr05545k24.pdf]
